# Supplementary material for: Bioactive Polyketides and Benzene Derivatives from Two Mangrove Sediment-Derived Fungi in the Beibu Gulf
Source: MDPI journal article supplement (doi:10.3390/md21060327), 2023-05-26
Supplement: s1 [file s1]

## Supporting Information

# Bioactive Polyketides and Benzene Derivatives from Two Mangrove Sediment-Derived Fungi in the Beibu Gulf

Bo Peng <sup>1,†</sup>, Jian Cai <sup>2,†</sup>, Zimin Xiao <sup>3</sup>, Manli Liu <sup>4</sup>, Xinlong Li <sup>2</sup>, Bin Yang <sup>2</sup>, Wei Fang <sup>4</sup>, Yi-You Huang <sup>5</sup>, Chunmei Chen <sup>2,\*</sup>, Xuefeng Zhou <sup>2,\*</sup>, Huaming Tao <sup>3,\*</sup>

<sup>1</sup> Institute for Environmental and Climate Research, Jinan University, Guangzhou, 511443, China; pengbo@jnu.edu.cn

<sup>2</sup> CAS Key Laboratory of Tropical Marine Bio-resources and Ecology/ Guangdong Key Laboratory of Marine Materia Medica, South China Sea Institute of Oceanology, Chinese Academy of Sciences, Guangzhou 510301, China; caijian19@mails.ucas.ac.cn (J.C.); 13409379936@163.com (X.L.); yangbin@scsio.ac.cn (B.Y.)

<sup>3</sup> Guangdong Provincial Key Laboratory of Chinese Medicine Pharmaceuticals, School of Traditional Chinese Medicine, Southern Medical University, Guangzhou 510515, China; 15917491112@163.com (Z.X.)

<sup>4</sup> Hubei Biopesticide Engineering Research Center, Hubei Academy of Agricultural Science, Wuhan 430064, China; manli.liu@nberc.com (M.L.); wei.fang@nberc.com (W.F.)

<sup>5</sup> Key Laboratory of Tropical Biological Resources of Ministry of Education, School of Pharmaceutical Sciences, Hainan University, Haikou, 570228, China. hyyou@hainanu.edu.cn (Y.H.)

\* Correspondence: chenchunmei18@mails.ucas.ac.cn (C.C.); xfzhou@scsio.ac.cn (X.Z.); taohm@smu.edu.cn (H.T.)

† These authors contributed equally to this work.

## Table of Contents

|                                                                                                                                              |    |
|----------------------------------------------------------------------------------------------------------------------------------------------|----|
| <b>The physicochemical data of the known compounds 2, 3, 6–9, and 13–23.</b>                                                                 | 4  |
| <b>Figure S1.</b> <sup>1</sup> H NMR spectrum of cordyanhydride A ethyl ester ( <b>1</b> ) in DMSO- <i>d</i> <sub>6</sub> .                  | 9  |
| <b>Figure S2.</b> <sup>13</sup> C NMR spectrum of cordyanhydride A ethyl ester ( <b>1</b> ) in DMSO- <i>d</i> <sub>6</sub> .                 | 9  |
| <b>Figure S3.</b> HSQC spectrum of cordyanhydride A ethyl ester ( <b>1</b> ) in DMSO- <i>d</i> <sub>6</sub> .                                | 10 |
| <b>Figure S4.</b> HMBC spectrum of cordyanhydride A ethyl ester ( <b>1</b> ) in DMSO- <i>d</i> <sub>6</sub> .                                | 10 |
| <b>Figure S5.</b> <sup>1</sup> H– <sup>1</sup> H COSY spectrum of cordyanhydride A ethyl ester ( <b>1</b> ) in DMSO- <i>d</i> <sub>6</sub> . | 11 |
| <b>Figure S6.</b> HRESIMS spectrum of cordyanhydride A ethyl ester ( <b>1</b> ).                                                             | 12 |
| <b>Figure S7.</b> IR spectrum of cordyanhydride A ethyl ester ( <b>1</b> ).                                                                  | 12 |
| <b>Figure S8.</b> UV spectrum of cordyanhydride A ethyl ester ( <b>1</b> ) in MeOH.                                                          | 13 |
| <b>Figure S9.</b> <sup>1</sup> H NMR spectrum of stachyline H ( <b>10</b> ) in DMSO- <i>d</i> <sub>6</sub> .                                 | 13 |
| <b>Figure S10.</b> <sup>13</sup> C NMR spectrum of stachyline H ( <b>10</b> ) in DMSO- <i>d</i> <sub>6</sub> .                               | 14 |
| <b>Figure S11.</b> HSQC spectrum of stachyline H ( <b>10</b> ) in DMSO- <i>d</i> <sub>6</sub> .                                              | 14 |
| <b>Figure S12.</b> HMBC spectrum of stachyline H ( <b>10</b> ) in DMSO- <i>d</i> <sub>6</sub> .                                              | 15 |
| <b>Figure S13.</b> <sup>1</sup> H– <sup>1</sup> H COSY spectrum of stachyline H ( <b>10</b> ) in DMSO- <i>d</i> <sub>6</sub> .               | 15 |
| <b>Figure S14.</b> NOESY spectrum of stachyline H ( <b>10</b> ) in DMSO- <i>d</i> <sub>6</sub> .                                             | 16 |
| <b>Figure S15.</b> HRESIMS spectrum of stachyline H ( <b>10</b> ).                                                                           | 17 |
| <b>Figure S16.</b> IR spectrum of stachyline H ( <b>10</b> ).                                                                                | 17 |
| <b>Figure S17.</b> UV spectrum of stachyline H ( <b>10</b> ) in MeOH.                                                                        | 18 |
| <b>Figure S18.</b> <sup>1</sup> H NMR spectrum of stachyline I ( <b>11</b> ) in DMSO- <i>d</i> <sub>6</sub> .                                | 18 |
| <b>Figure S19.</b> <sup>13</sup> C NMR spectrum of stachyline I ( <b>11</b> ) in DMSO- <i>d</i> <sub>6</sub> .                               | 19 |
| <b>Figure S20.</b> HSQC spectrum of stachyline I ( <b>11</b> ) in DMSO- <i>d</i> <sub>6</sub> .                                              | 19 |
| <b>Figure S21.</b> HMBC spectrum of stachyline I ( <b>11</b> ) in DMSO- <i>d</i> <sub>6</sub> .                                              | 20 |
| <b>Figure S22.</b> <sup>1</sup> H– <sup>1</sup> H COSY spectrum of stachyline I ( <b>11</b> ) in DMSO- <i>d</i> <sub>6</sub> .               | 20 |
| <b>Figure S23.</b> NOESY spectrum of stachyline I ( <b>11</b> ) in DMSO- <i>d</i> <sub>6</sub> .                                             | 21 |
| <b>Figure S24.</b> HRESIMS spectrum of stachyline I ( <b>11</b> ).                                                                           | 22 |
| <b>Figure S25.</b> IR spectrum of stachyline I ( <b>11</b> ).                                                                                | 22 |
| <b>Figure S26.</b> UV spectrum of stachyline I ( <b>11</b> ) in MeOH.                                                                        | 23 |
| <b>Figure S27.</b> <sup>1</sup> H NMR spectrum of stachyline J ( <b>12</b> ) in DMSO- <i>d</i> <sub>6</sub> .                                | 23 |

|                                                                                                               |    |
|---------------------------------------------------------------------------------------------------------------|----|
| <b>Figure S28.</b> $^{13}\text{C}$ NMR spectrum of stachyline J ( <b>12</b> ) in $\text{DMSO}-d_6$ .          | 24 |
| <b>Figure S29.</b> HSQC spectrum of stachyline J ( <b>12</b> ) in $\text{DMSO}-d_6$ .                         | 24 |
| <b>Figure S30.</b> HMBC spectrum of stachyline J ( <b>12</b> ) in $\text{DMSO}-d_6$ .                         | 25 |
| <b>Figure S31.</b> $^1\text{H}-^1\text{H}$ COSY spectrum of stachyline J ( <b>12</b> ) in $\text{DMSO}-d_6$ . | 25 |
| <b>Figure S32.</b> NOESY spectrum of stachyline J ( <b>12</b> ) in $\text{DMSO}-d_6$ .                        | 26 |
| <b>Figure S33.</b> HRESIMS spectrum of stachyline J ( <b>12</b> ).                                            | 27 |
| <b>Figure S34.</b> IR spectrum of stachyline J ( <b>12</b> ).                                                 | 27 |
| <b>Figure S35.</b> UV spectrum of stachyline J ( <b>12</b> ) in MeOH.                                         | 28 |
| <b>Figure S36.</b> ECD spectrum of stachyline J ( <b>12</b> ) in MeOH.                                        | 29 |
| <b>Figure S37.</b> $^1\text{H}$ NMR spectrum of maleicanhydridane ( <b>4</b> ) in $\text{DMSO}-d_6$ .         | 29 |
| <b>Figure S38.</b> $^{13}\text{C}$ NMR spectrum of maleicanhydridane ( <b>4</b> ) in $\text{DMSO}-d_6$ .      | 29 |
| <b>Figure S39.</b> HRESIMS spectrum of maleicanhydridane ( <b>4</b> ).                                        | 30 |
| <b>ECD Calculation Details for 5.</b>                                                                         | 30 |
| <b>Table S1.</b> Energies of <b>5</b> at MMFF94 force field.                                                  | 31 |
| <b>Table S2.</b> Energies of <b>5</b> at B3LYP/6-31+g(d) level in methanol.                                   | 31 |
| <b>The strain's (<i>Talaromyces</i> sp. SCSIO 41050) ITS sequence of the rDNA.</b>                            | 32 |
| <b>The strain's (<i>Penicillium</i> sp. SCSIO 41411) ITS sequence of the rDNA.</b>                            | 32 |

**The physicochemical data of the known compounds 2, 3, 6–9, and 13–23.**

Cordyanhydride A methyl ester (**2**): Yellow oil;  $^1\text{H}$  NMR (500 MHz,  $\text{DMSO-}d_6$ )  $\delta_{\text{H}}$  7.30 (1H, dt,  $J = 16.0, 6.5$  Hz, H-12), 6.65 (1H, dt,  $J = 16.0, 1.5$  Hz, H-11), 3.81 (3H, s,  $\text{OCH}_3$ -1), 2.91 (2H, t,  $J = 7.0$  Hz, H-3), 2.82 (2H, dd,  $J = 7.5, 6.5$  Hz, H<sub>2</sub>-2), 2.71 (2H, ddd,  $J = 12.5, 7.5, 2.5$  Hz, H-6), 2.63 (1H, dt,  $J = 14.0, 7.0$  Hz,  $\alpha$ 8-H), 2.50 (2H, pd,  $J = 7.5, 1.5$  Hz, H-13), 2.28 (1H, hept,  $J = 6.5$  Hz,  $\beta$ H-8), 1.52 (2H, p,  $J = 7.0$  Hz, H-19), 1.27 (3H, t,  $J = 7.5$  Hz, H-14), 1.10 (3H, t,  $J = 7.5$  Hz, H-20);  $^{13}\text{C}$  NMR (125 MHz,  $\text{DMSO-}d_6$ )  $\delta_{\text{C}}$  171.9 (C-1), 166.1 (C-17), 166.0 (C-16), 165.5 (C-15), 164.5 (C-18), 147.7 (C-12), 144.0 (C-5), 143.1 (C-4), 138.1 (C-10), 137.6 (C-9), 116.9 (C-11), 51.6 ( $-\text{OCH}_3$ ), 37.6 (C-7), 30.6 (C-2), 27.9 (C-6), 27.3 (C-8), 26.6 (C-13), 25.7 (C-19), 19.4 (C-3), 12.4 (C-14), 10.5 (C-20).

Cordyanhydride A (**3**): Yellow oil;  $^1\text{H}$  NMR (500 MHz,  $\text{DMSO-}d_6$ )  $\delta_{\text{H}}$  7.08 (1H, dt,  $J = 15.4, 6.3$  Hz, H-12), 6.43 (1H, dt,  $J = 15.4, 1.4$  Hz, H-11), 2.65 (2H, t,  $J = 7.7$  Hz, H<sub>2</sub>-3), 2.52 (4H, m, H-2/ $\alpha$ H-6/ $\alpha$ H-8), 2.41 (1H, dt,  $J = 14.0, 6.3$  Hz,  $\beta$ H-6), 2.28 (2H, pd,  $J = 7.7, 1.4$  Hz, H-13), 2.06 (1H, p,  $J = 7.0$  Hz,  $\beta$ H-8), 1.30 (2H, p,  $J = 7.0$  Hz, H-19), 1.05 (3H, t,  $J = 7.7$  Hz, H-14), 0.88 (3H, t,  $J = 7.7$  Hz, H-20);  $^{13}\text{C}$  NMR (125 MHz,  $\text{DMSO-}d_6$ )  $\delta_{\text{C}}$  173.0 (C-1), 166.2 (C-17), 166.1 (C-16), 165.6 (C-15), 164.5 (C-18), 147.8 (C-12), 144.4 (C-5), 143.0 (C-4), 138.1 (C-10), 137.7 (C-9), 117.0 (C-11), 37.7 (C-7), 31.0 (C-2), 28.0 (C-6), 27.5 (C-8), 26.7 (C-13), 25.8 (C-19), 19.6 (C-3), 12.5 (C-14), 10.6 (C-20).

Austdiol (**5**): Yellow powder,  $[\alpha]_{\text{D}}^{25} +23$  ( $c$  0.05,  $\text{CH}_3\text{OH}$ ); UV ( $\text{CH}_3\text{OH}$ )  $\lambda_{\text{max}}$  (log  $\epsilon$ ) 200 (3.61), 256 (3.71), 380 (3.93) nm; IR (film)  $\nu_{\text{max}}$  3392, 2920, 1681, 1471, 1199, 1138, 1045  $\text{cm}^{-1}$ ;  $^1\text{H}$  NMR (500 MHz,  $\text{DMSO-}d_6$ )  $\delta_{\text{H}}$  10.00 (1H, s, H-12), 8.20 (1H, s, H-1), 8.19 (1H, s, H-4), 5.93 (1H, brs, 8-OH), 5.23 (1H, brs, 7-OH), 4.39 (1H, s, H-8), 2.42 (3H, s, H-11), 1.09 (3H, s, H-13);  $^{13}\text{C}$  NMR (125 MHz,  $\text{DMSO-}d_6$ )  $\delta_{\text{C}}$  198.3 (C-6), 189.4 (CHO-12), 166.3 (C-3), 151.9 (C-1), 148.7 (C-10), 122.2 (C-9), 108.2 (C-5), 106.4 (C-4), 74.3 (C-7), 70.6 (C-8), 18.8 (C-13), 19.9 (C-11); HRESIMS  $m/z$  237.0765  $[\text{M} + \text{H}]^+$  (calcd for  $\text{C}_{12}\text{H}_{13}\text{O}_5^+$ , 237.0757), 259.0581  $[\text{M} + \text{Na}]^+$  (calcd for  $\text{C}_{12}\text{H}_{12}\text{NaO}_5^+$ , 259.0577).

7-epiaustdiol (**6**): Yellow powder,  $[\alpha]_{\text{D}}^{25} +172$  ( $c$  0.05, CH<sub>3</sub>OH); <sup>1</sup>H NMR (700 MHz, DMSO-*d*<sub>6</sub>)  $\delta_{\text{H}}$  9.98 (1H, s, H-12), 8.29 (1H, s, H-1), 8.20 (1H, s, H-4), 4.31 (1H, s, H-8), 2.42 (3H, s, H-11), 1.14 (3H, s, H-13); <sup>13</sup>C NMR (175 MHz, DMSO-*d*<sub>6</sub>)  $\delta_{\text{C}}$  198.3 (C-6), 189.2 (CHO-12), 166.0 (C-3), 152.7 (C-1), 148.0 (C-10), 121.5 (C-9), 108.2 (C-5), 106.7 (C-4), 74.5 (C-7), 71.5 (C-8), 21.9 (C-13), 20.0 (C-11).

8-*O*-methylepiaustdiol (**7**): Yellow powder,  $[\alpha]_{\text{D}}^{25} +160$  ( $c$  0.05, CH<sub>3</sub>OH); <sup>1</sup>H NMR (500 MHz, DMSO-*d*<sub>6</sub>)  $\delta_{\text{H}}$  9.96 (1H, s, H-12), 8.44 (1H, s, H-4), 8.18 (1H, s, H-1), 3.96 (1H, s, H-1), 3.18 (3H, s, H-14), 2.41 (3H, s, H-11), 1.11 (3H, s, H-13); <sup>13</sup>C NMR (125 MHz, DMSO-*d*<sub>6</sub>)  $\delta_{\text{C}}$  198.5 (C-6), 189.1 (CHO-12), 166.2 (C-3), 152.7 (C-1), 147.5 (C-10), 117.2 (C-9), 108.4 (C-5), 106.8 (C-4), 81.1 (C-8), 74.2 (C-7), 56.8 (C-14), 23.2 (C-13), 20.0 (C-11).

4-Hydroxy-3,6-dimethyl-2*H*-pyran-2-one (**8**): White powder, <sup>1</sup>H NMR (500 MHz, DMSO-*d*<sub>6</sub>)  $\delta_{\text{H}}$  11.08 (1H, s, 3-OH), 5.98 (1H, s, H-4), 2.13 (3H, s, H-6), 1.73 (3H, s, H-7); <sup>13</sup>C NMR (125 MHz, DMSO-*d*<sub>6</sub>)  $\delta_{\text{C}}$  165.2 (C-1), 165.0 (C-3), 159.4 (C-5), 99.8 (C-4), 96.4 (C-2), 19.3 (C-6), 8.4 (C-7).

2,4-Dihydroxy-3,6-dimethylbenzoic acid (**9**): Red powder, <sup>1</sup>H NMR (700 MHz, DMSO-*d*<sub>6</sub>)  $\delta_{\text{H}}$  13.44 (1H, s, 1-COOH), 12.62 (1H, s, 2-OH), 10.04 (1H, s, 4-OH), 6.25 (1H, s, H-5), 2.39 (3H, s, H-9), 1.93 (3H, s, H-8); <sup>13</sup>C NMR (175 MHz, DMSO-*d*<sub>6</sub>)  $\delta_{\text{C}}$  174.2 (C-7), 163.1 (C-2), 160.0 (C-4), 139.6 (C-6), 110.3 (C-5), 107.9 (C-1), 103.5 (C-3), 23.8 (C-9), 8.0 (C-8).

Stachyline G (**13**): Colorless oil; <sup>1</sup>H NMR (700 MHz, DMSO-*d*<sub>6</sub>)  $\delta_{\text{H}}$  7.12 (2H, d,  $J$  = 8.0 Hz, H-2, 6), 6.80 (2H, d,  $J$  = 8.1 Hz, H-3, 5), 5.42 (1H, m, H-2'), 4.55 (2H, d,  $J$  = 6.4 Hz, H-1), 3.99 (2H, s, H-4'), 3.31 (2H, s, H-7), 1.75 (3H, s, H-5'); <sup>13</sup>C NMR (175 MHz, DMSO-*d*<sub>6</sub>)  $\delta_{\text{C}}$  174.2 (C-8), 156.58 (C-4), 140.24 (C-3'), 130.21 (C-2), 130.21 (C-6), 129.27 (C-1), 121.31 (C-2'), 114.05 (C-3), 114.05 (C-5), 63.57 (C-1'), 59.83 (C-4'), 42.24 (C-7), 20.99 (C-5).

Stachyline F (**14**): White powder; <sup>1</sup>H NMR (500 MHz, DMSO-*d*<sub>6</sub>)  $\delta_{\text{H}}$  7.15 (2H, d,  $J$  = 8.5 Hz, H-2, 6), 6.87 (2H, d,  $J$  = 8.5 Hz, H-3, 5), 5.64 (1H, q,  $J$  = 5.4 Hz, H-2'), 4.57

(2H, d,  $J = 6.5$  Hz, H-1'), 3.85 (2H, s, H-4'), 3.47 (2H, s, H-7), 1.65 (3H, s, H-5');  $^{13}\text{C}$  NMR (125 MHz, DMSO- $d_6$ )  $\delta_{\text{C}}$  173.1 (C-8), 157.2 (C-4), 140.5 (C-3'), 130.4 (C-2), 130.4 (C-6), 127.0 (C-1), 118.2 (C-2'), 114.4 (C-3), 114.4 (C-5), 65.5 (C-1'), 64.0 (C-4'), 40.0 (C-7), 13.8 (C-5').

(*E*)-4-(4-Hydroxy-3-methylbut-2-enyloxy)benzaldehyde (**15**): Colorless oil;  $^1\text{H}$  NMR (700 MHz, DMSO- $d_6$ )  $\delta_{\text{H}}$  9.86 (1H, s, 1-CHO), 7.86 (2H, d,  $J = 8.7$  Hz, H-2, 6), 7.13 (2H, d,  $J = 8.7$  Hz, H-3, 5), 5.66 (1H, td,  $J=6.6, 1.4$  Hz, H-2'), 4.72 (2H, d,  $J = 6.7$  Hz, H-1'), 3.85 (2H, s, H-4'), 1.67 (3H, s, H-5');  $^{13}\text{C}$  NMR (175 MHz, DMSO- $d_6$ )  $\delta_{\text{C}}$  191.3 (1-CHO), 163.5 (C-4), 141.5 (C-3'), 131.8 (C-2), 131.8 (C-6), 129.6 (C-1), 117.1 (C-2'), 115.1 (C-3), 115.1 (C-5), 65.3 (C-4'), 64.7 (C-1'), 13.8 (C-5').

Stachyline E (**16**): Colorless oil;  $^1\text{H}$  NMR (500 MHz, DMSO- $d_6$ )  $\delta_{\text{H}}$  7.14 (2H, d,  $J = 8.3$  Hz, H-2, 6), 6.86 (2H, d,  $J = 8.5$  Hz, H-3, 5), 4.19 (1H, dd,  $J = 10.1, 2.2$  Hz, H-1'a), 3.76 (1H, dd,  $J = 10.0, 8.1$  Hz, H-1'b), 3.52 (1H, dd,  $J = 8.1, 2.2$  Hz, H-2'), 3.45 (2H, s, H-7), 1.13 (3H, s, H-4'), 1.07 (3H, s, H-5');  $^{13}\text{C}$  NMR (125 MHz, DMSO- $d_6$ )  $\delta_{\text{C}}$  173.2 (C-8), 157.6 (C-4), 130.3 (C-2, 6), 127.1 (C-1), 114.3 (C-3, 5), 75.8 (C-2'), 70.8 (C-3'), 69.8 (C-1'a), 40.1 (C-7), 27.4 (C-4'), 24.3 (C-5').

Penialidins C (**17**): Yellow powder;  $^1\text{H}$  NMR (500 MHz, DMSO- $d_6$ )  $\delta_{\text{H}}$  6.86 (1H, s, H-13), 5.69 (1H, s, H-3), 5.15 (2H, s, H-6), 2.00 (3H, s, H-1);  $^{13}\text{C}$  NMR (125 MHz, DMSO- $d_6$ )  $\delta_{\text{C}}$  171.0 (C-7), 169.0 (C-14), 167.3 (C-2), 158.3 (C-4), 150.0 (C-12), 144.9 (C-9), 144.1 (C-11), 117.3 (C-10), 112.2 (C-8), 103.1 (C-13), 101.1 (C-5), 94.4 (C-3), 64.1 (C-6), 19.9 (C-1).

Dibutylphthalate (**18**): Colorless oil;  $^1\text{H}$  NMR (500 MHz, DMSO- $d_6$ )  $\delta_{\text{H}}$  7.73 (2H, dt,  $J=7.3, 3.7$  Hz, H-2, 5), 7.68 (2H, dd,  $J=5.7, 3.3$  Hz, H-3, 4); dibutyl protons: 4.24 (4H, t,  $J=6.5$  Hz), 1.65 (4H, m), 1.39 (4H, m), 0.93 (6H, t,  $J=7.4$  Hz, 2CH<sub>3</sub>);  $^{13}\text{C}$  NMR (125 MHz, DMSO)  $\delta_{\text{C}}$  167.5 (C-1), 132.2 (C-2), 132.1 (C-3), 129.2 (C-4), 65.6 (C-5), 30.5 (C-6), 19.2 (C-7), 14.1 (C-8).

Brefeldin G (**19**): White powder;  $^1\text{H}$  NMR (500 MHz, DMSO- $d_6$ )  $\delta_{\text{H}}$  6.73 (1H, dd,  $J=15.5, 4.5$  Hz, H-3), 5.84 (1H, d,  $J=15.4$  Hz, H-2), 5.32 (2H, m, H-10, 11), 4.07 (1H, d,  $J=4.7$  Hz, H-4), 4.01 (1H, dd,  $J=6.4, 4.4$  Hz, H-7), 2.39 (2H, t,  $J=7.3$  Hz, H-14), 2.33 (1H, d,  $J=8.4$  Hz, H-9), 2.06 (3H, s, H-16), 1.99 (1H, m, H-5), 1.90 (2H, m, H-12), 1.84 (1H, m, H-6a), 1.64 (1H, m, H-13a), 1.50 (2H, m, H-6b, 13b), 1.27-1.35 (2H, m, H-8).  $^{13}\text{C}$  NMR (125 MHz, DMSO- $d_6$ )  $\delta_{\text{C}}$  208.5 (C-15), 167.8 (C-1), 150.9 (C-3), 135.1 (C-11), 128.8 (C-10), 120.7 (C-2), 70.4 (C-7), 69.0 (C-4), 48.5 (C-5), 42.6 (C-9), 42.5 (C-8), 42.0 (C-14), 35.1 (C-6), 31.3 (C-12), 29.8 (C-16), 23.1 (C-13).

9,12-octadecadieonic acid (**20**):  $^1\text{H}$  NMR (500 MHz, Chloroform- $d$ )  $\delta_{\text{H}}$  5.36 (4H, m, H-9, 10, 12, 13), 2.77 (2H, t,  $J=6.6$  Hz, H-11), 2.35 (2H, t,  $J=7.5$  Hz, H-2), 2.05 (4H, q,  $J=6.9$  Hz, H-8, 14), 1.63 (2H, m, H-3), 1.33 (14H, m, H-4, 5, 6, 7, 15, 16, 17), 0.89 (3H, t,  $J=6.5$  Hz, H-18);  $^{13}\text{C}$  NMR (125 MHz, Chloroform- $d$ )  $\delta_{\text{C}}$  178.7 (C-1), 130.4 (C-9), 130.2 (C-10), 128.2 (C-12), 128.1 (C-13), 33.9, 31.7, 29.7, 29.5, 29.3, 29.2, 29.2, 27.4, 27.3, 25.8, 24.8, 22.7, 14.2.

$\alpha$ -linolenic acid (**21**):  $^1\text{H}$  NMR (500 MHz, Chloroform- $d$ )  $\delta_{\text{H}}$  5.45 (6H, m, H-9, 10, 12, 13, 15, 16), 2.81 (4H, t,  $J=6.0$  Hz, H-11, 14), 2.34 (2H, t,  $J=7.5$  Hz, H-2), 2.07 (4H, m, H-8, 17), 1.63 (2H, m, H-3), 1.33 (10H, d,  $J=9.4$  Hz, H-4, 5, 6, 7), 0.97 (3H, t,  $J=7.5$  Hz, H-18);  $^{13}\text{C}$  NMR (125 MHz, Chloroform- $d$ )  $\delta_{\text{C}}$  180.1 (C-1), 132.1 (C-9), 130.4 (C-10), 128.4 (C-12), 128.4 (C-13), 127.9 (C-15), 127.3 (C-16), 34.2 (C-2), 29.7 (C-4), 29.3 (C-5), 29.2 (C-6), 29.2 (C-7), 27.3 (C-3), 25.8 (C-8), 25.7 (C-11), 24.8 (C-14), 20.7 (C-17), 14.4 (C-18).

Linoleic acid (**22**):  $^1\text{H}$  NMR (500 MHz, Chloroform- $d$ )  $\delta_{\text{H}}$  11.30 (1H, s, -COOH), 5.35 (4H, ddq,  $J=14.0, 7.1, 4.3, 3.4$  Hz, H-9, 10, 12, 13), 2.77 (2H, t,  $J=6.5$  Hz, H-11), 2.34 (2H, t,  $J=7.5$  Hz, H-2), 2.05 (4H, q,  $J=6.8$  Hz, H-8, 14), 1.63 (2H, m, H-3), 1.32 (14H, m, H-4, 5, 6, 7, 15, 16, 17), 0.89 (3H, t,  $J=6.8$  Hz, H-18);  $^{13}\text{C}$  NMR (125 MHz, Chloroform- $d$ )  $\delta_{\text{C}}$  180.7 (C-1), 130.3 (C-9), 130.1 (C-10), 128.2 (C-12), 128.0 (C-13), 34.3 (C-2), 31.7 (C-4), 29.7 (C-5), 29.5 (C-6), 29.3 (C-7), 29.2 (C-15), 29.2 (C-16), 27.3 (C-8), 27.3 (C-14), 25.8 (C-11), 24.8 (C-3), 22.7 (C-17), 14.2 (C-18).

Glycerol monlinoleate (**23**):  $^1\text{H}$  NMR (500 MHz, Chloroform-*d*)  $\delta_{\text{H}}$  5.33 (4H, m, H-9', 10', 12', 13'), 4.12 (2H, m, H-1), 3.89 (1H, m, H-2), 3.66 (1H, dd,  $J=11.6, 3.7$  Hz, H-3a), 3.56 (1H, dd,  $J=11.6, 6.0$  Hz, H-3b), 2.75 (2H, t,  $J=6.7$  Hz, H-11'), 2.32 (2H, t,  $J=7.6$  Hz, H-2'), 2.03 (4H, q,  $J=7.0$  Hz, H-8', 14'), 1.60 (2H, t,  $J=7.3$  Hz, H-3'), 1.30 (14H, m, 4'~7', H-15'~17'), 0.87 (3H, t,  $J=6.8$  Hz, H-18');  $^{13}\text{C}$  NMR (125 MHz,  $\text{CDCl}_3$ )  $\delta_{\text{C}}$  174.4 (C-1'), 130.3 (C-9'), 130.0 (C-13'), 128.1 (C-10'), 127.9 (C-12'), 70.3 (C-2), 65.1 (C-1), 63.4 (C-3), 34.2 (C-2'), 31.6 (C-14'), 29.6 (C-16'), 29.4 (C-7'), 29.2 (C-8'), 29.2 (C-2',15'), 27.2 (4', 5'), 25.7 (C-6'), 24.9 (C-8'), 22.6 (C-17'), 14.1 (C-18').



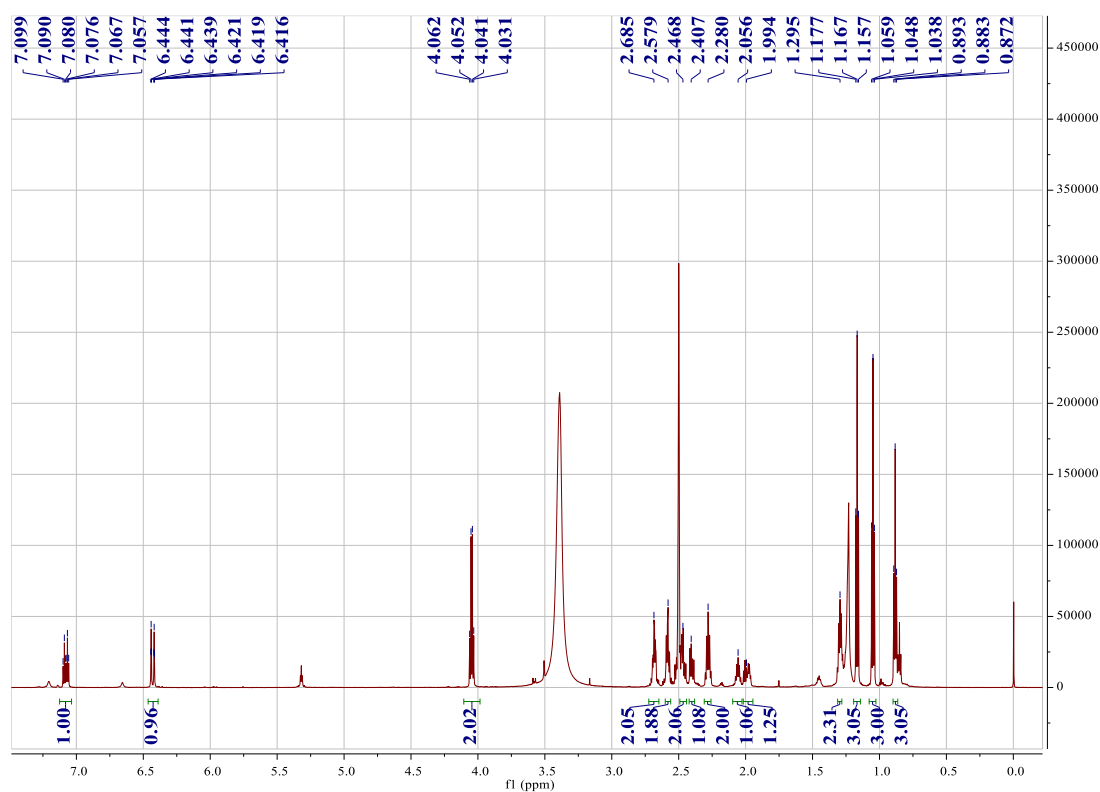

**Figure S1.**  $^1\text{H}$  NMR spectrum of cordyanhydride A ethyl ester (**1**) in  $\text{DMSO}-d_6$ .

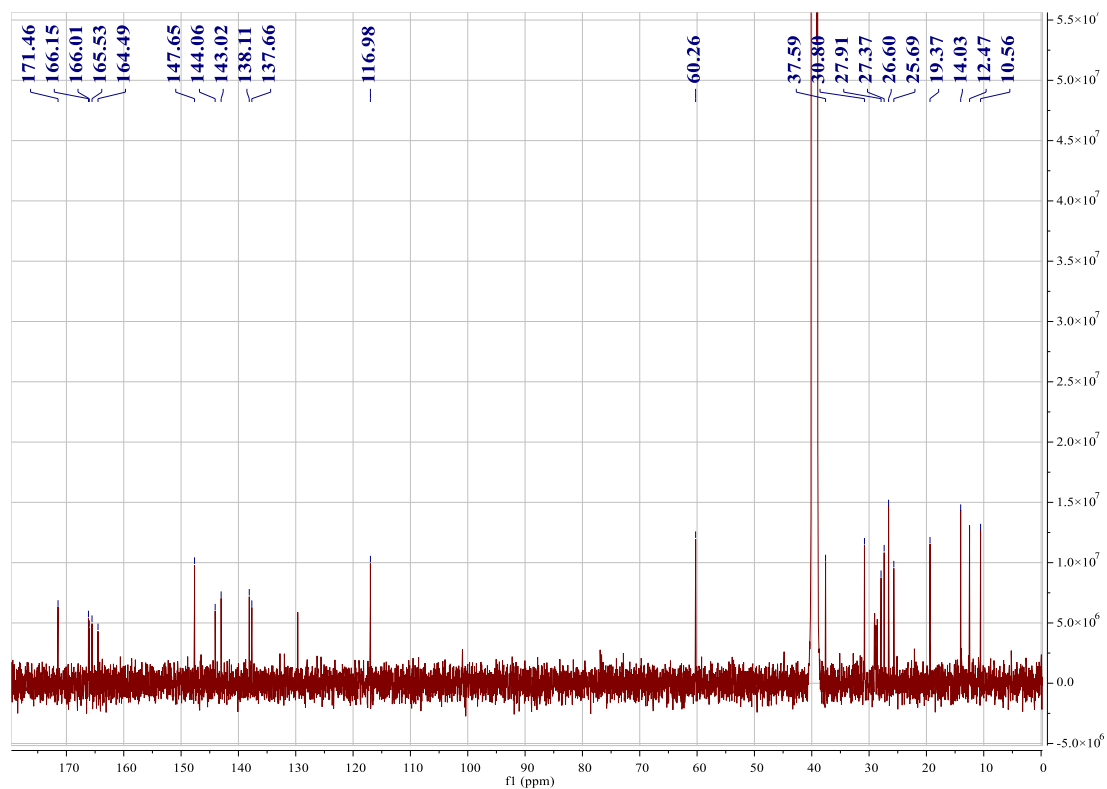

**Figure S2.**  $^{13}\text{C}$  NMR spectrum of cordyanhydride A ethyl ester (**1**) in  $\text{DMSO}-d_6$ .

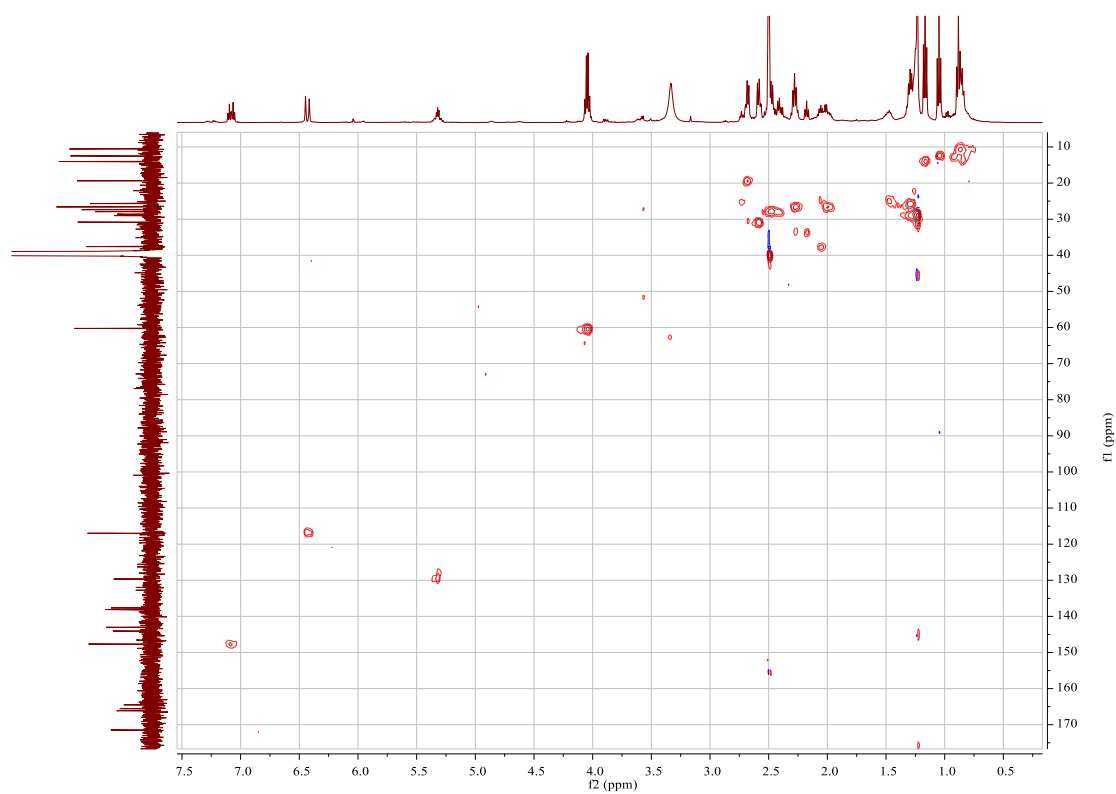

**Figure S3.** HSQC spectrum of cordyanhydride A ethyl ester (**1**) in DMSO- $d_6$ .

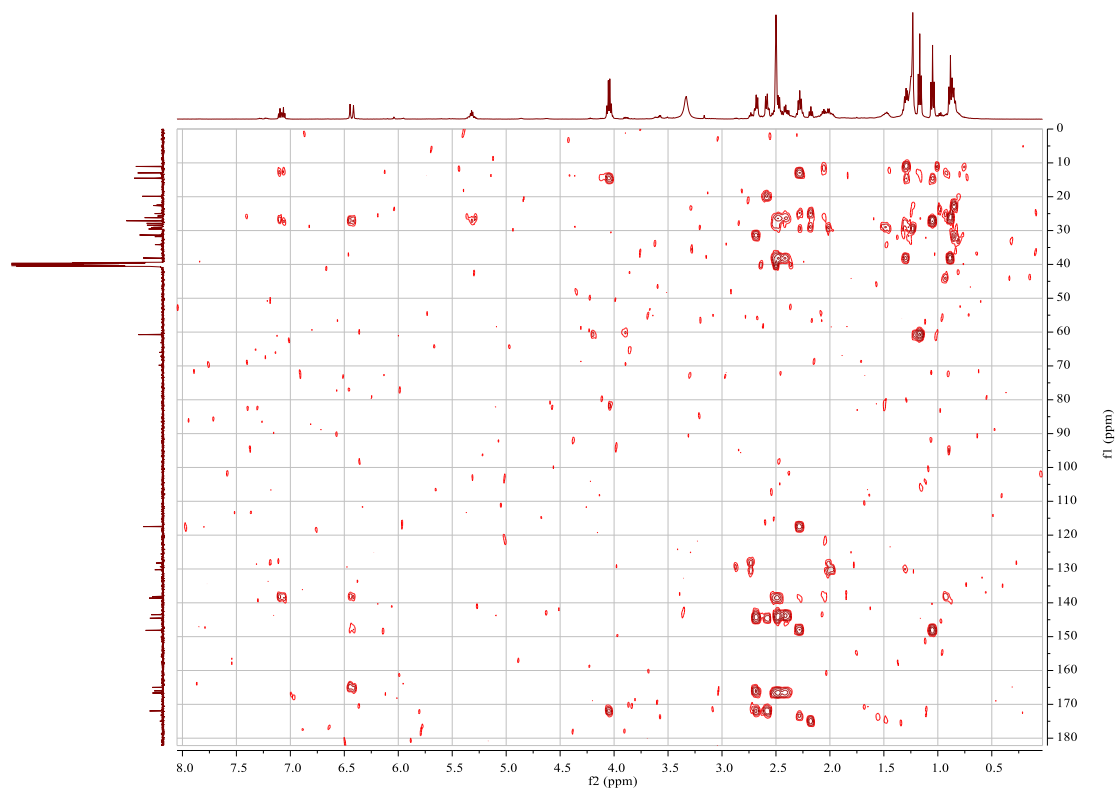

**Figure S4.** HMBC spectrum of cordyanhydride A ethyl ester (**1**) in DMSO- $d_6$ .

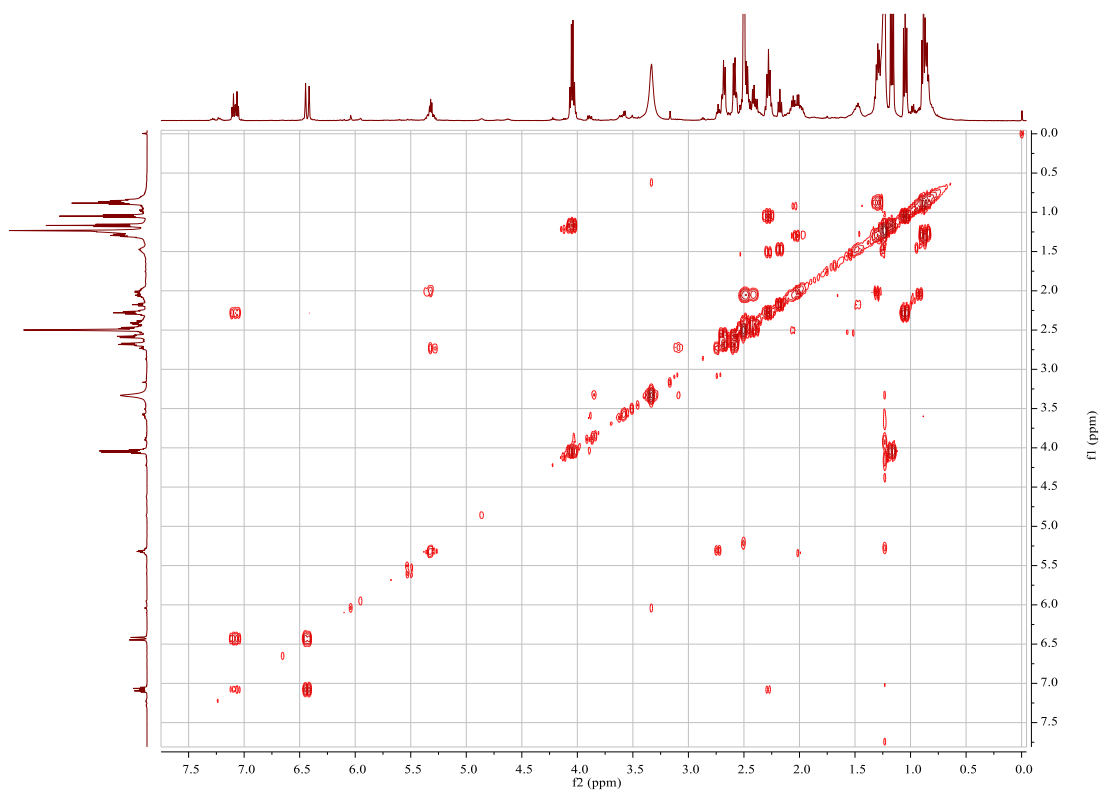

**Figure S5.**  $^1\text{H}$ - $^1\text{H}$  COSY spectrum of cordyanhydride A ethyl ester (**1**) in  $\text{DMSO-}d_6$ .

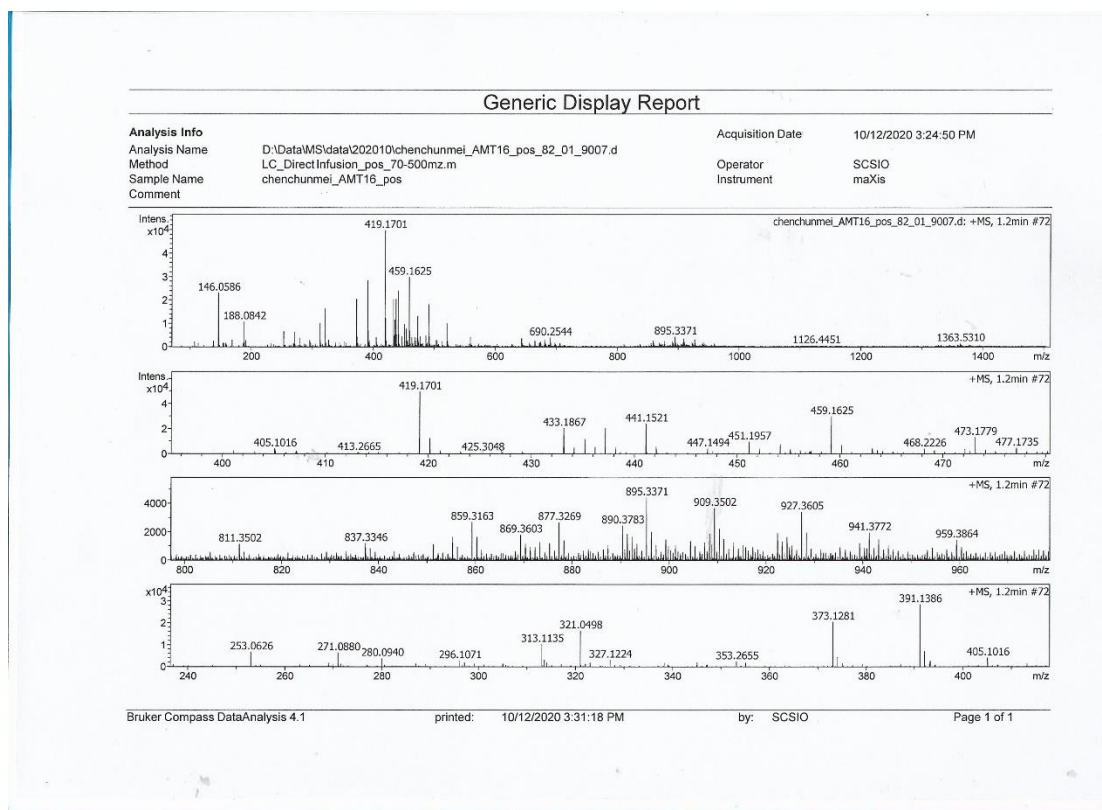

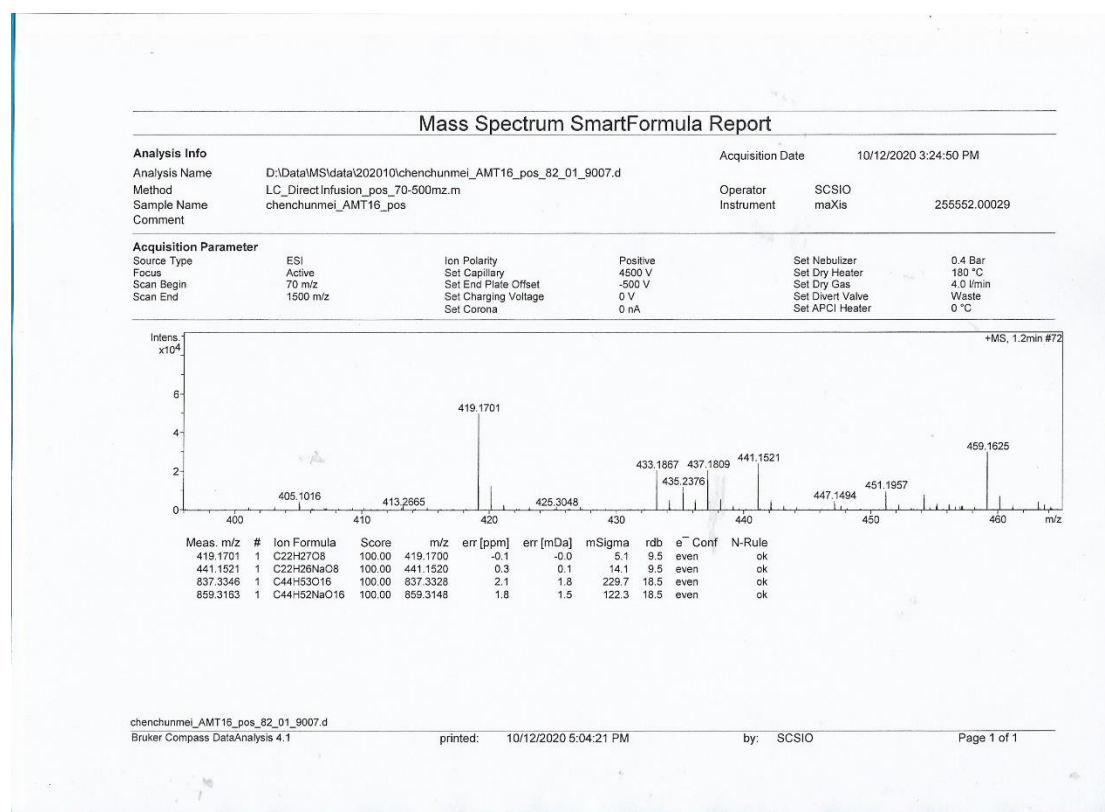

**Figure S6.** HRESIMS spectrum of cordyanhydride A ethyl ester (**1**).

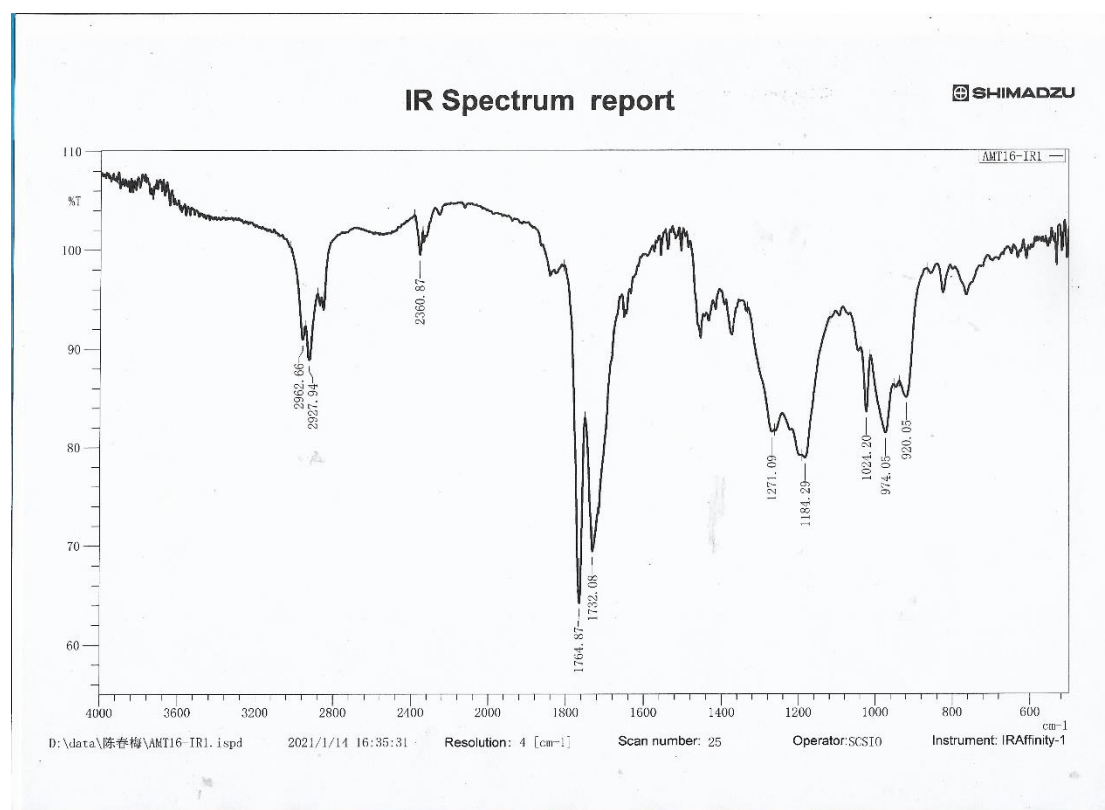

**Figure S7.** IR spectrum of cordyanhydride A ethyl ester (**1**).

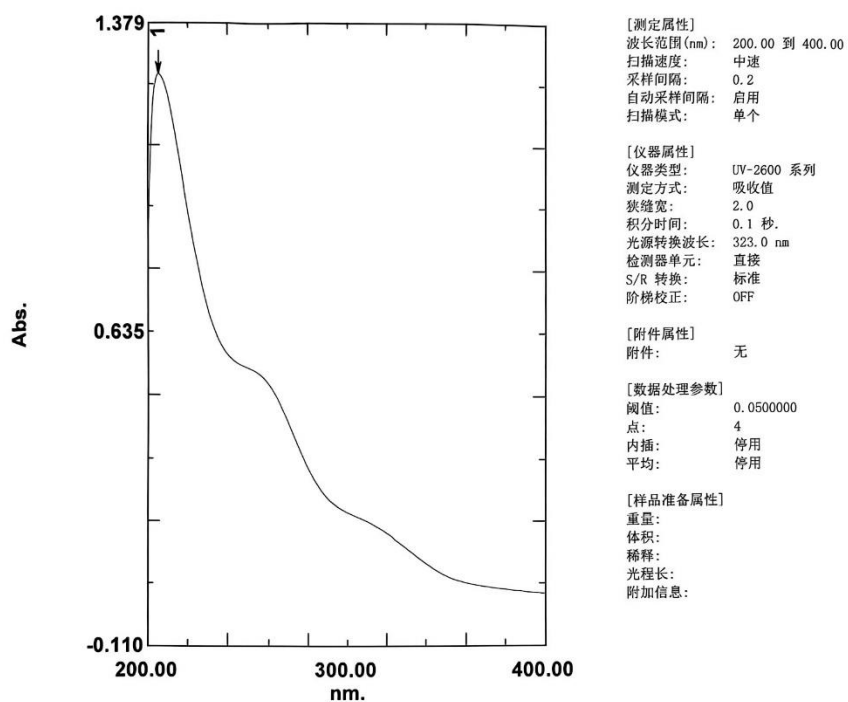

**Figure S8.** UV spectrum of cordyanhydride A ethyl ester (**1**) in MeOH.

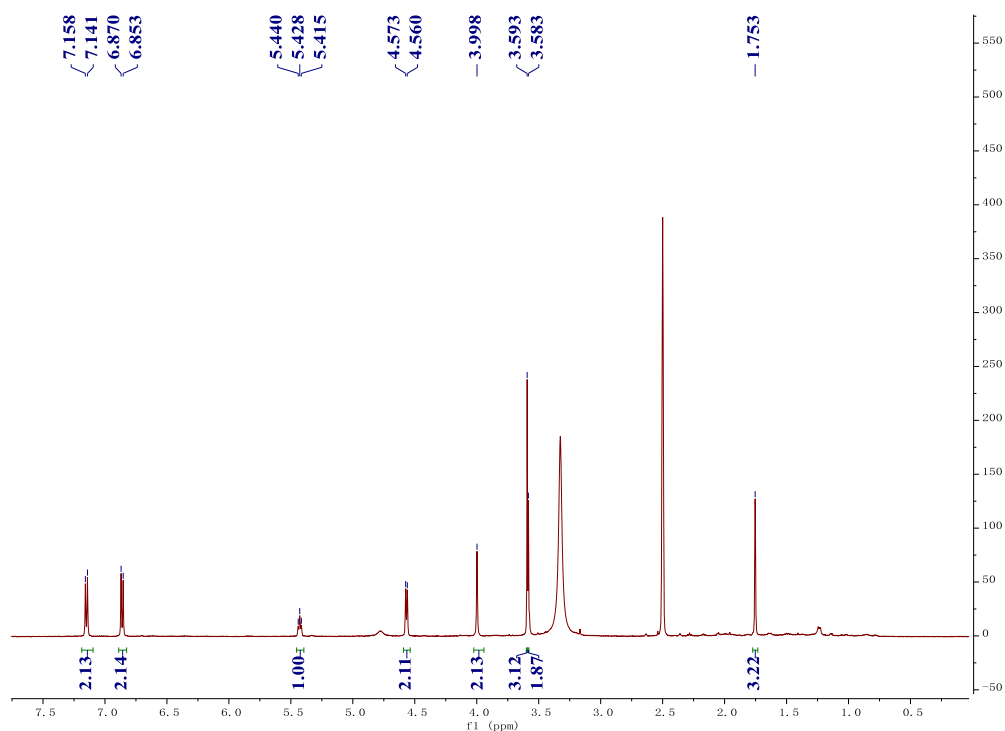

**Figure S9.**  $^1\text{H}$  NMR spectrum of stachyline H (**10**) in  $\text{DMSO}-d_6$ .

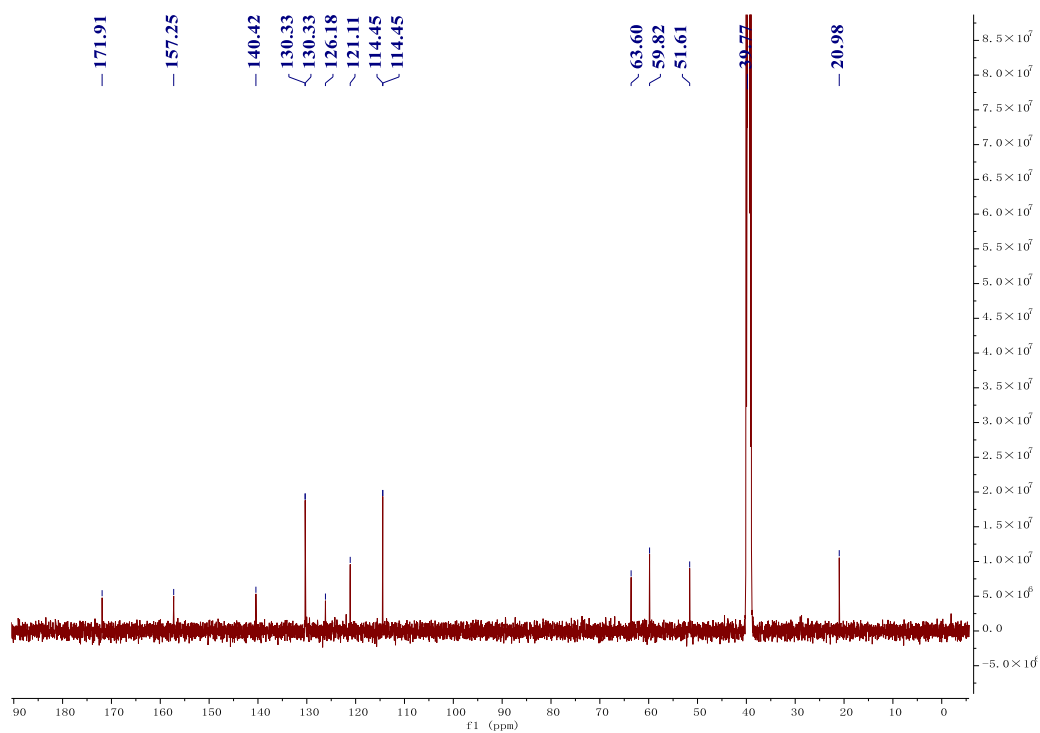

**Figure S10.**  $^{13}\text{C}$  NMR spectrum of stachyline H (**10**) in  $\text{DMSO-}d_6$ .

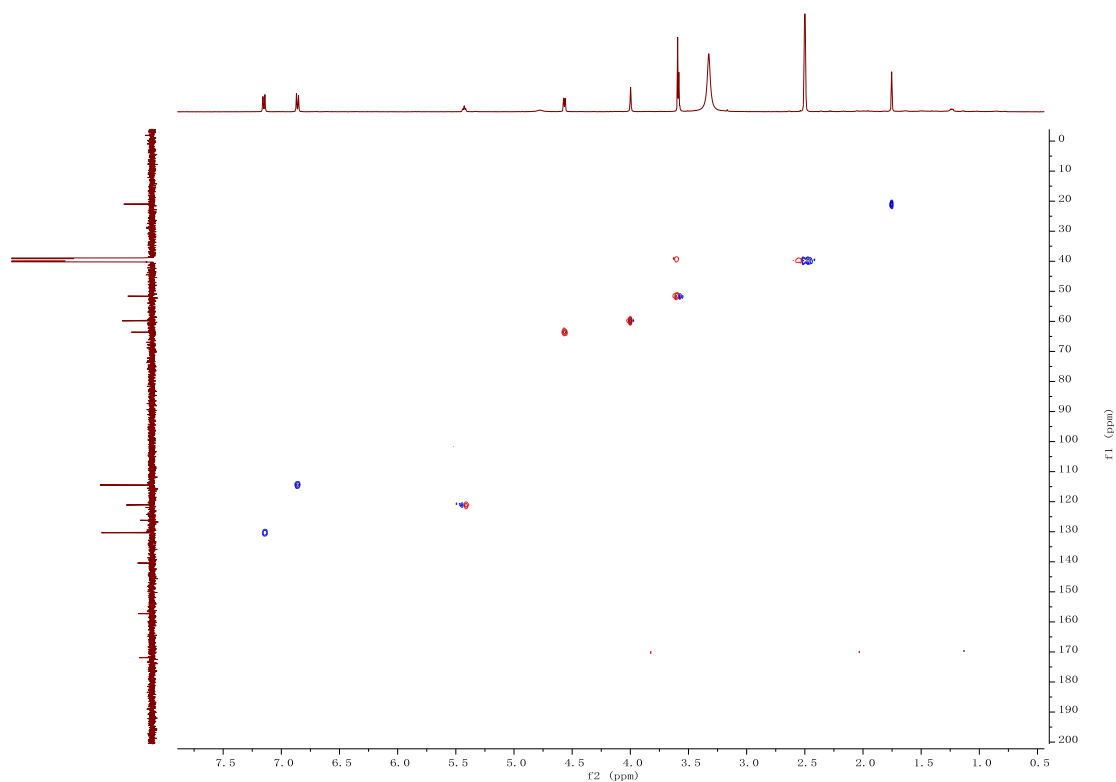

**Figure S11.** HSQC spectrum of stachyline H (**10**) in  $\text{DMSO-}d_6$ .

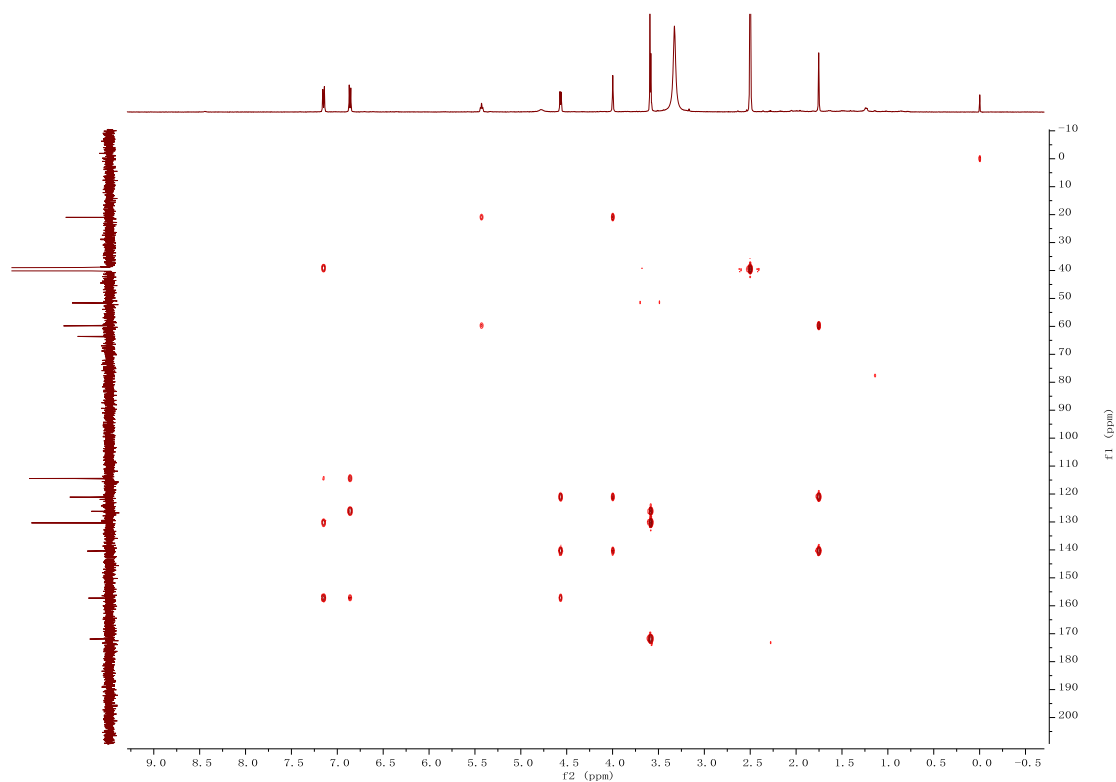

**Figure S12.** HMBC spectrum of stachyline H (**10**) in DMSO- $d_6$ .

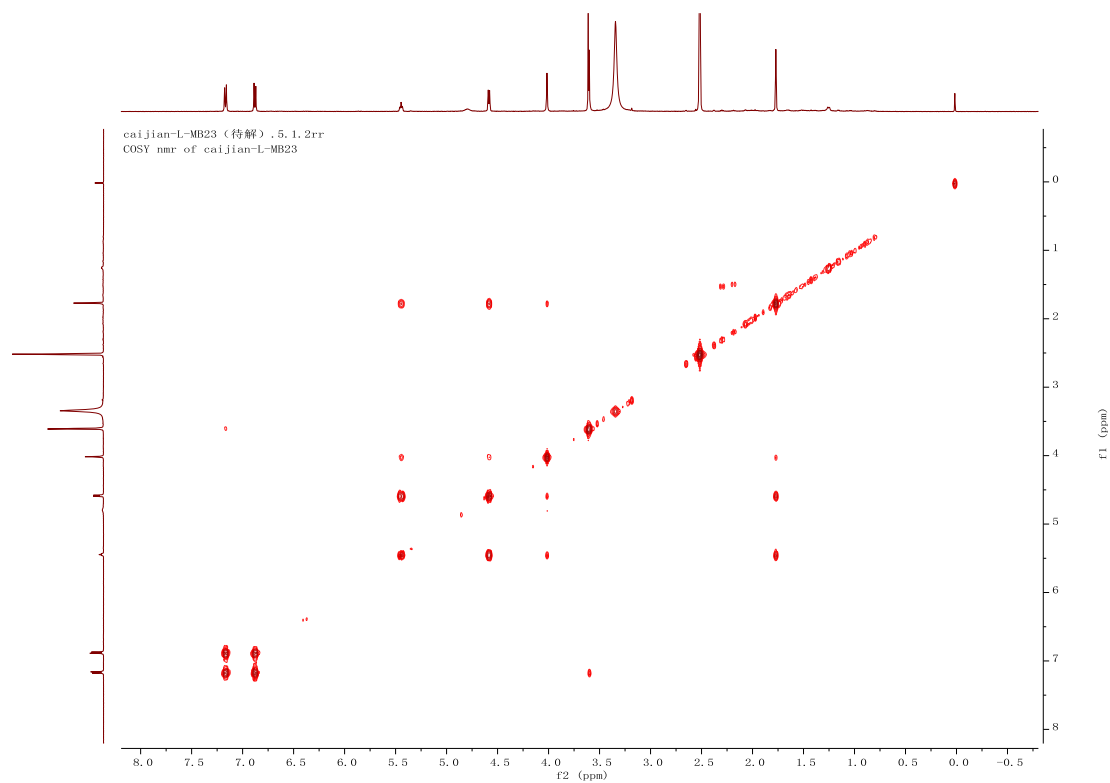

**Figure S13.**  $^1\text{H}$ - $^1\text{H}$  COSY spectrum of stachyline H (**10**) in DMSO- $d_6$ .





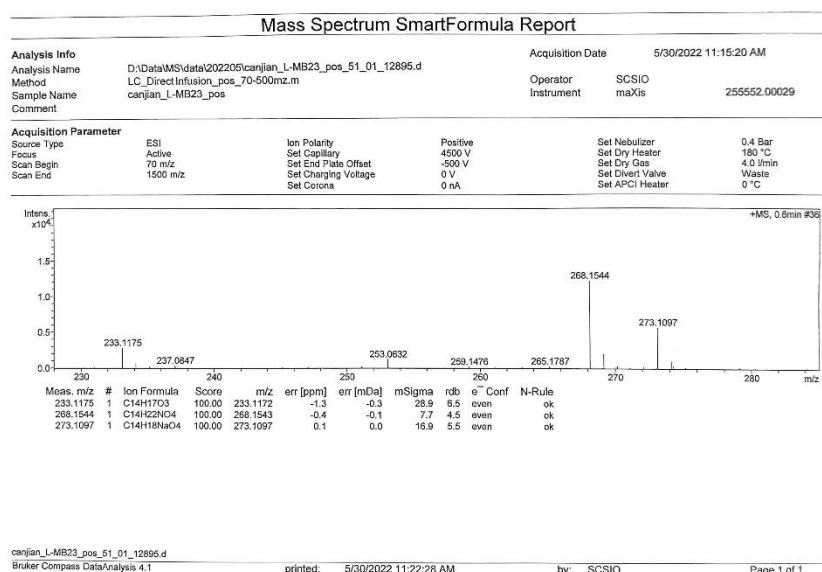

**Figure S15.** HRESIMS spectrum of stachyline H (**10**).

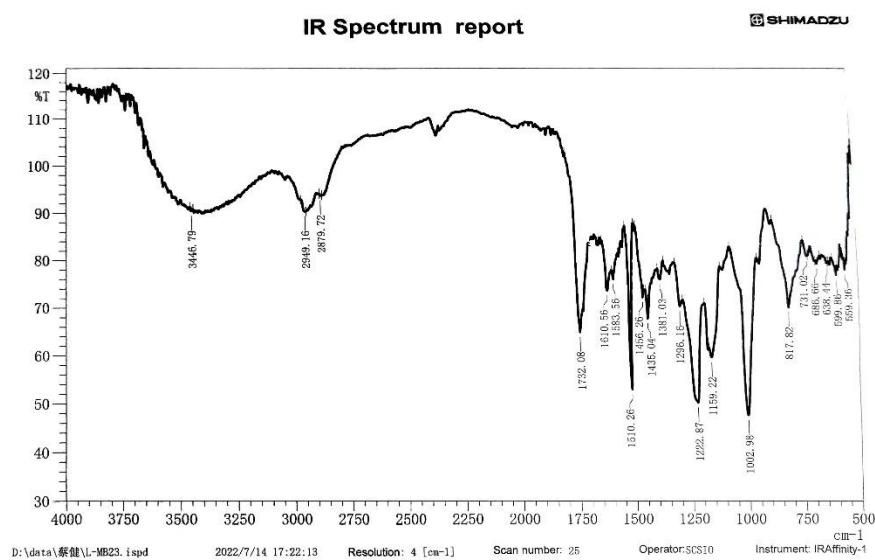

**Figure S16.** IR spectrum of stachyline H (**10**).

数据集: MB23 - RawData

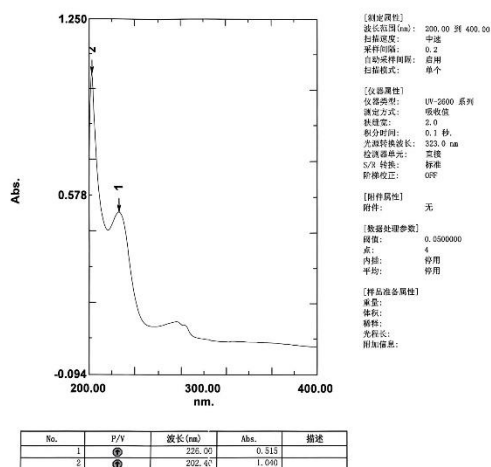

页 1 / 1

Figure S17. UV spectrum of stachyline H (**10**) in MeOH.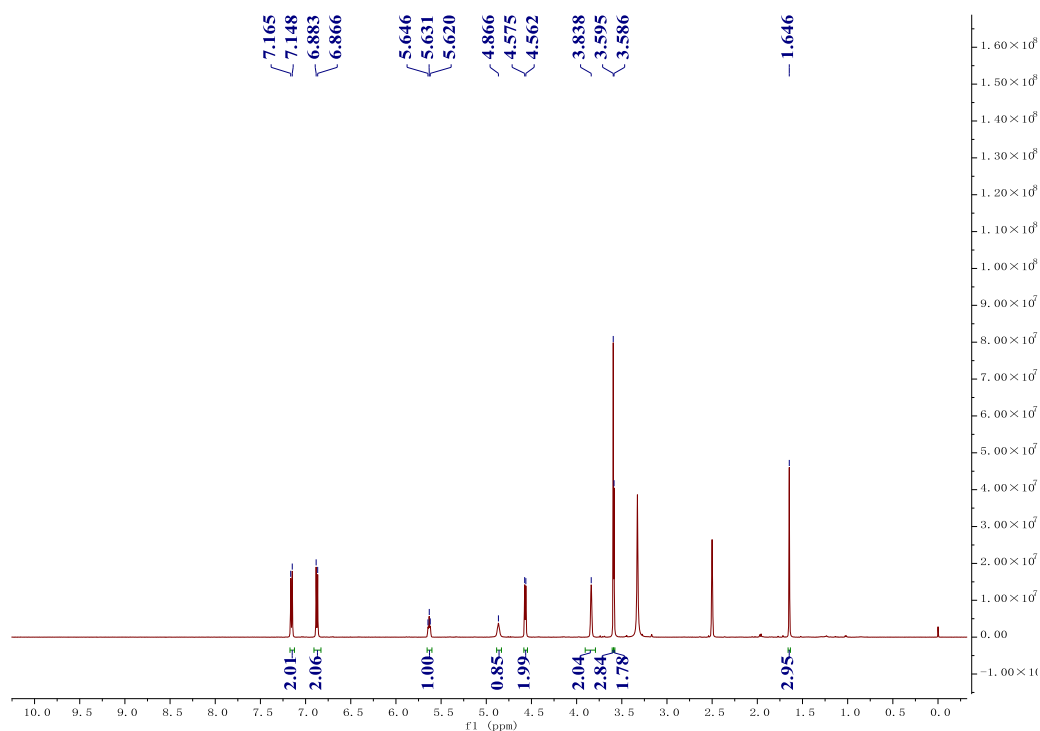Figure S18.  $^1\text{H}$  NMR spectrum of stachyline I (**11**) in  $\text{DMSO}-d_6$ .

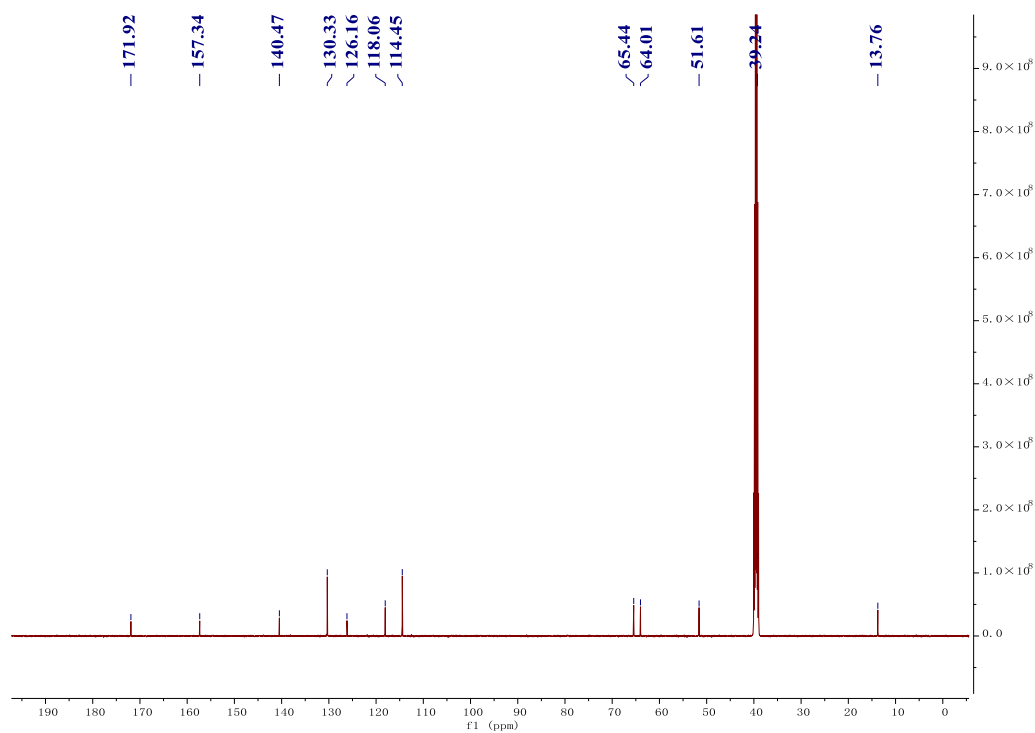

**Figure S19.**  $^{13}\text{C}$  NMR spectrum of stachyline I (**11**) in  $\text{DMSO-}d_6$ .

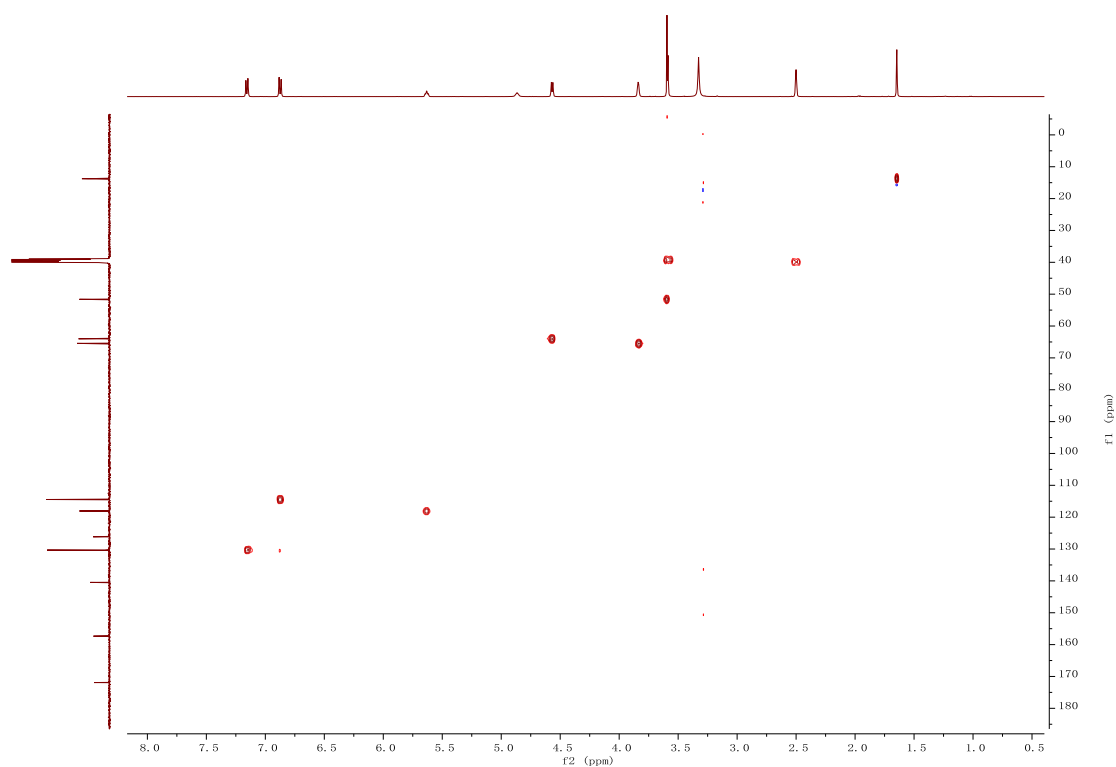

**Figure S20.** HSQC spectrum of stachyline I (**11**) in  $\text{DMSO-}d_6$ .

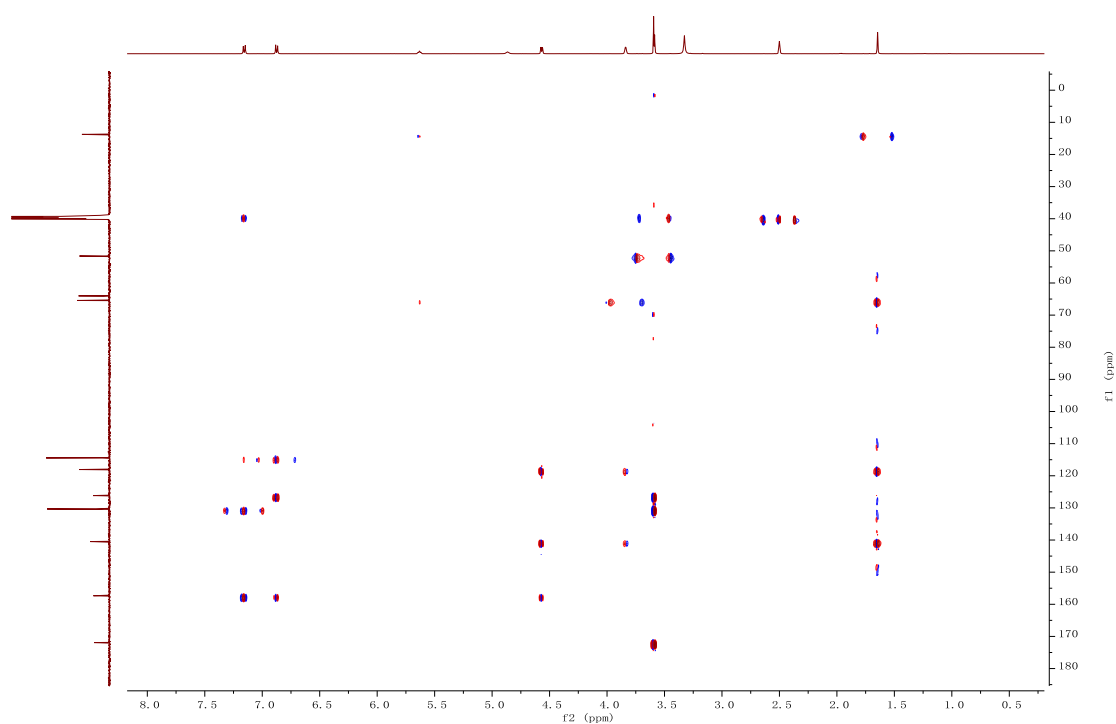

**Figure S21.** HMBC spectrum of stachyline I (**11**) in DMSO- $d_6$ .

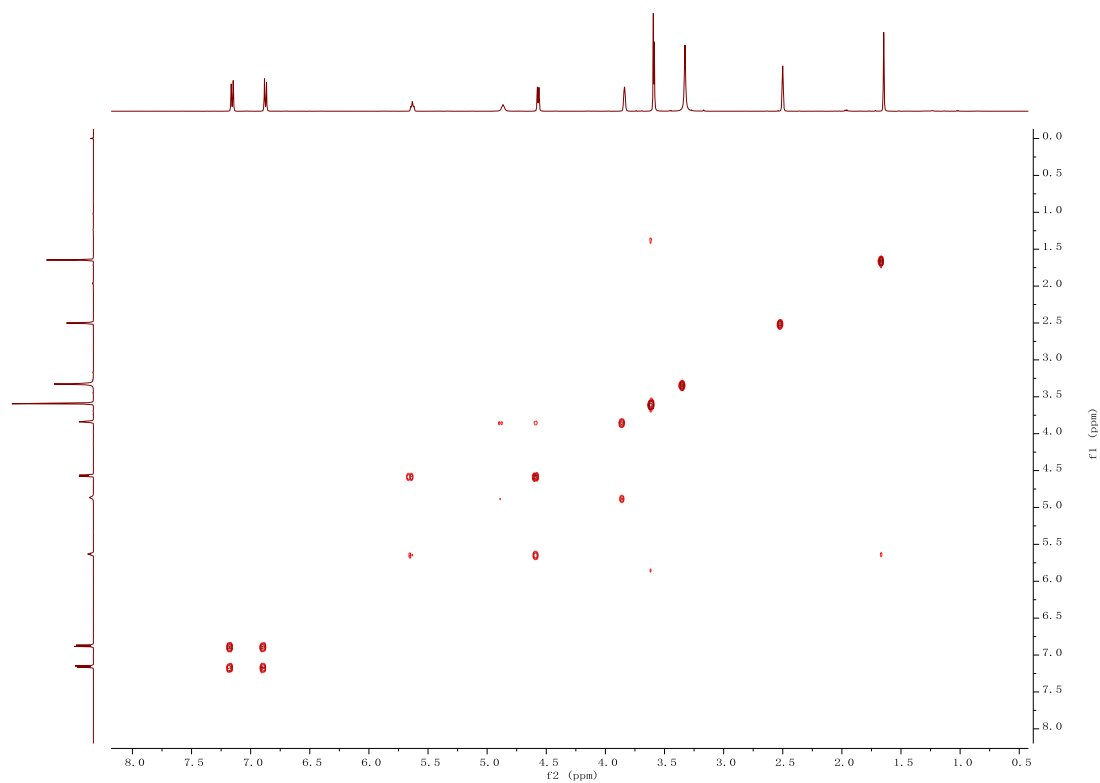

**Figure S22.**  $^1\text{H}$ - $^1\text{H}$  COSY spectrum of stachyline I (**11**) in DMSO- $d_6$ .

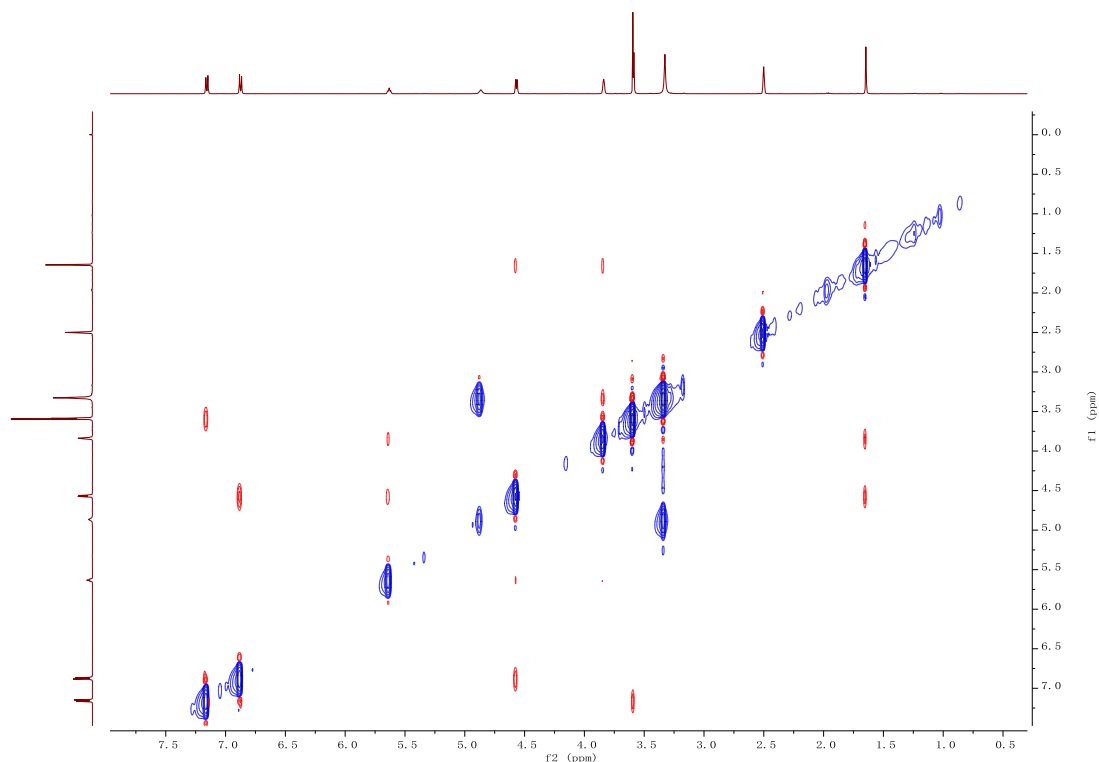

**Figure S23.** NOESY spectrum of stachyline I (**11**) in DMSO- $d_6$ .

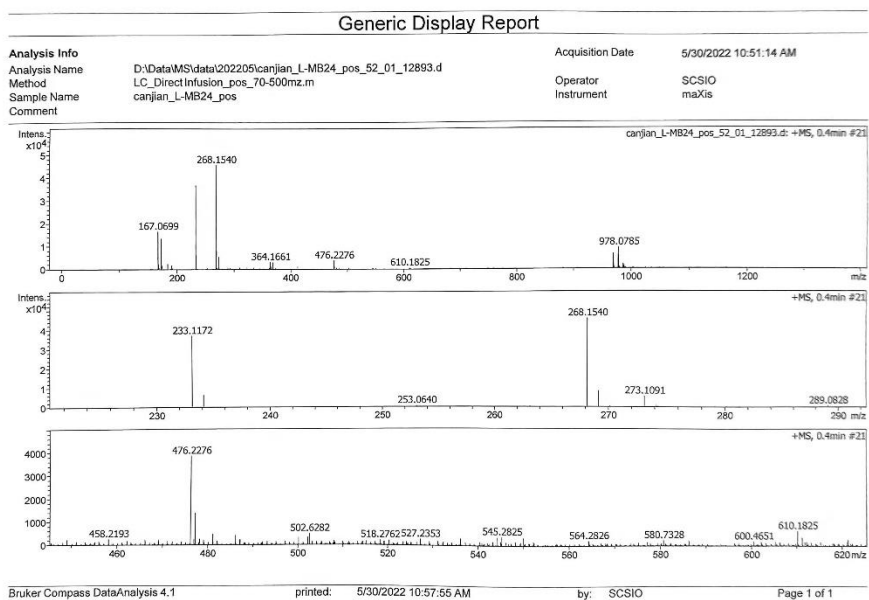

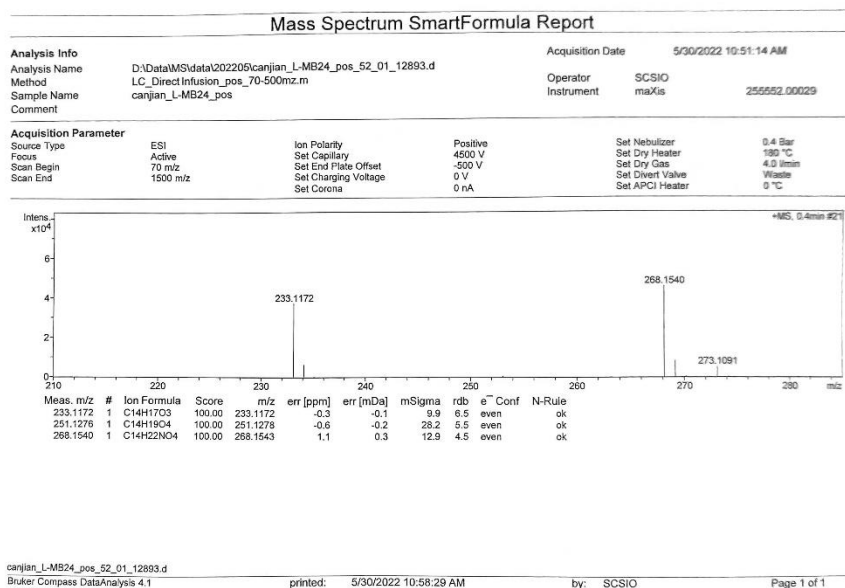

**Figure S24.** HRESIMS spectrum of stachyline I (11).

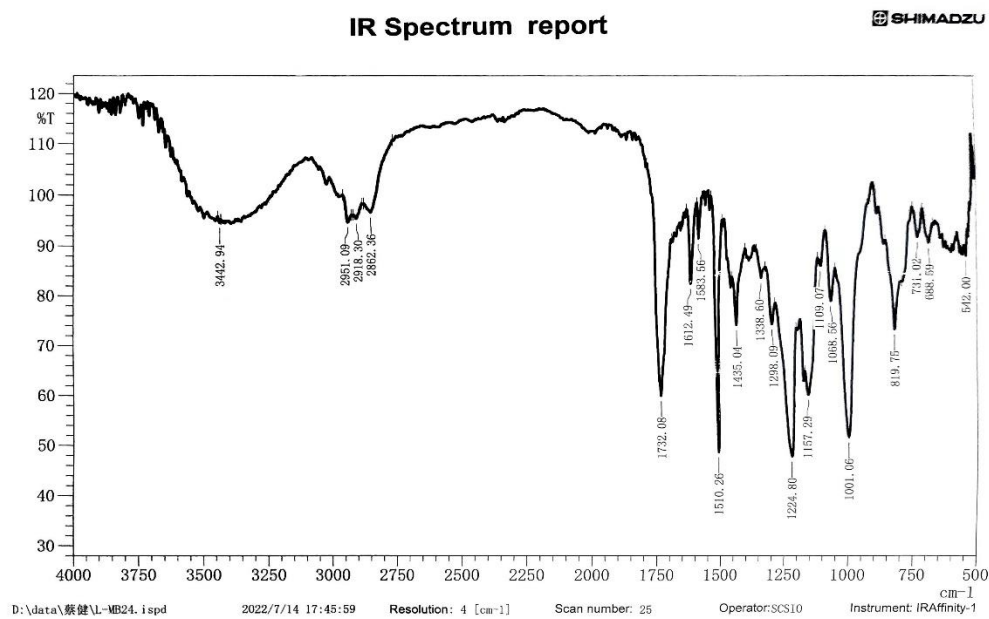

**Figure S25.** IR spectrum of stachyline I (11).

数据表: MB24 - RawData

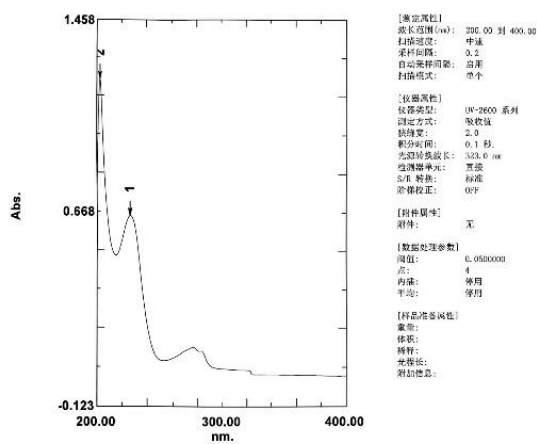

| No. | P/V | 波长 (nm) | Abs.  | 描述 |
|-----|-----|---------|-------|----|
| 1   | ①   | 225.46  | 0.651 |    |
| 2   | ②   | 202.46  | 1.210 |    |

页 1/1

Figure S26. UV spectrum of stachyline I (11) in MeOH.

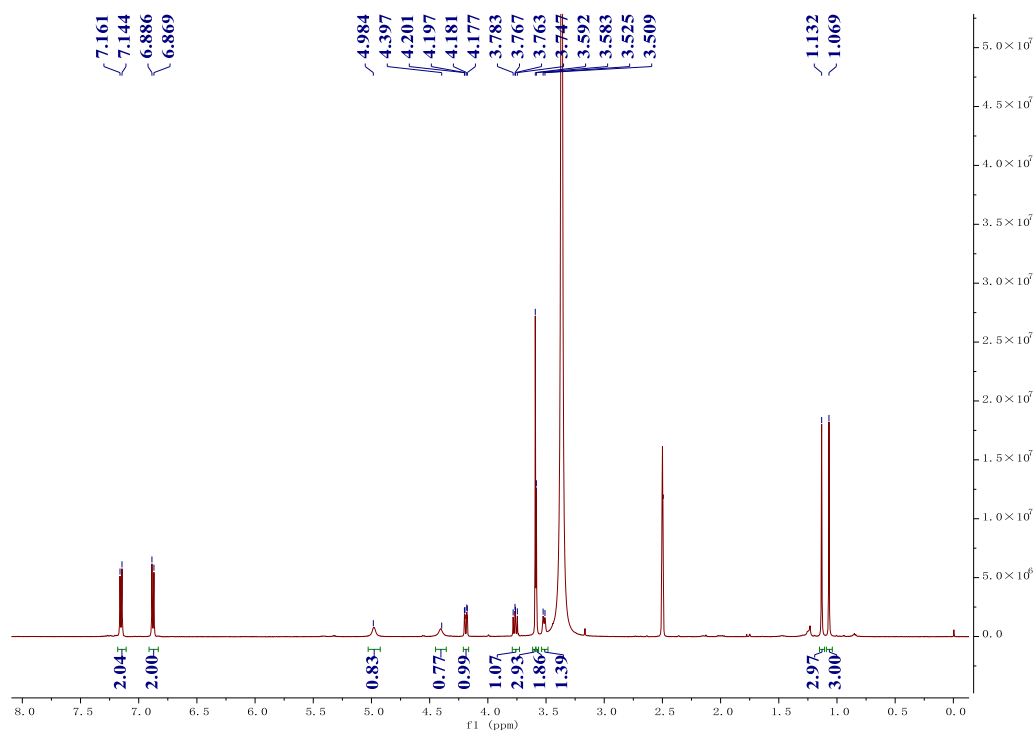Figure S27.  $^1\text{H}$  NMR spectrum of stachyline J (12) in  $\text{DMSO}-d_6$ .

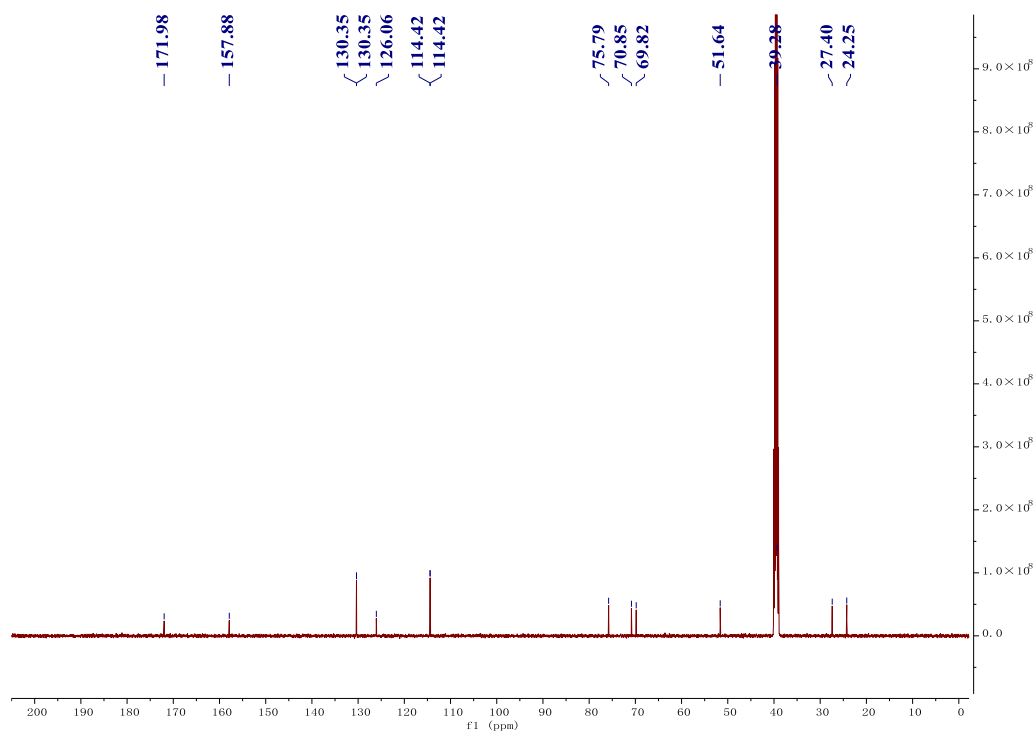

**Figure S28.** <sup>13</sup>C NMR spectrum of stachyline J (**12**) in DMSO-*d*<sub>6</sub>.

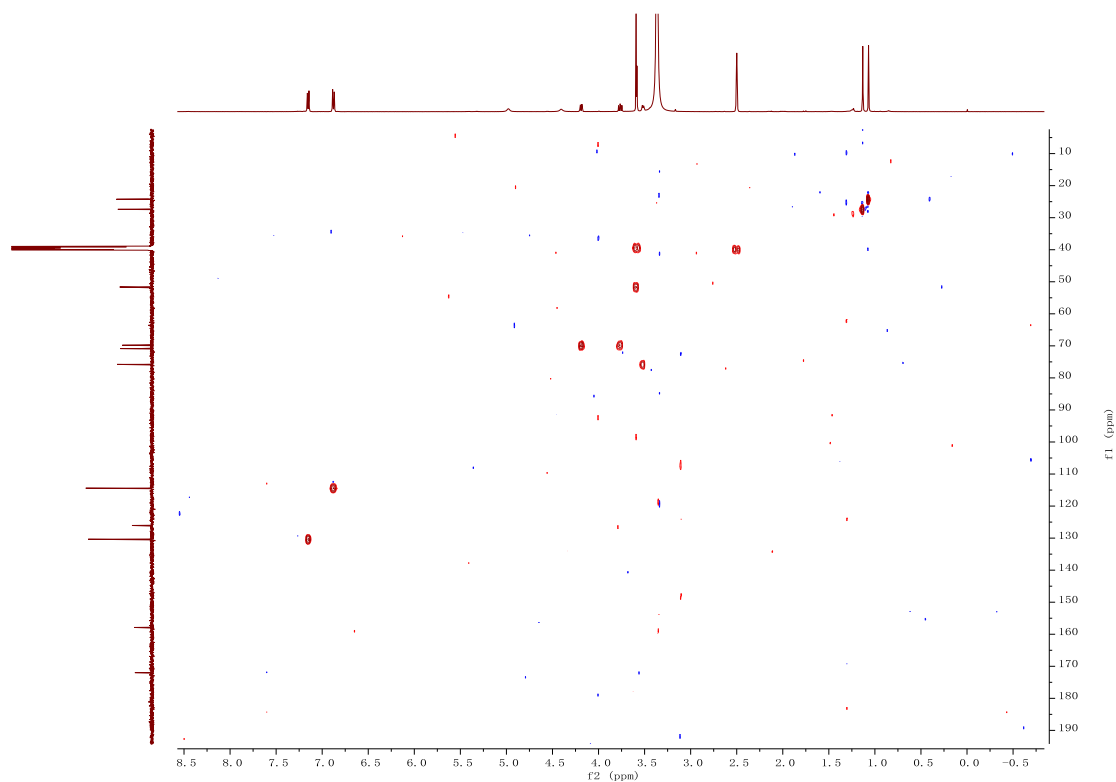

**Figure S29.** HSQC spectrum of stachyline J (**12**) in DMSO-*d*<sub>6</sub>.



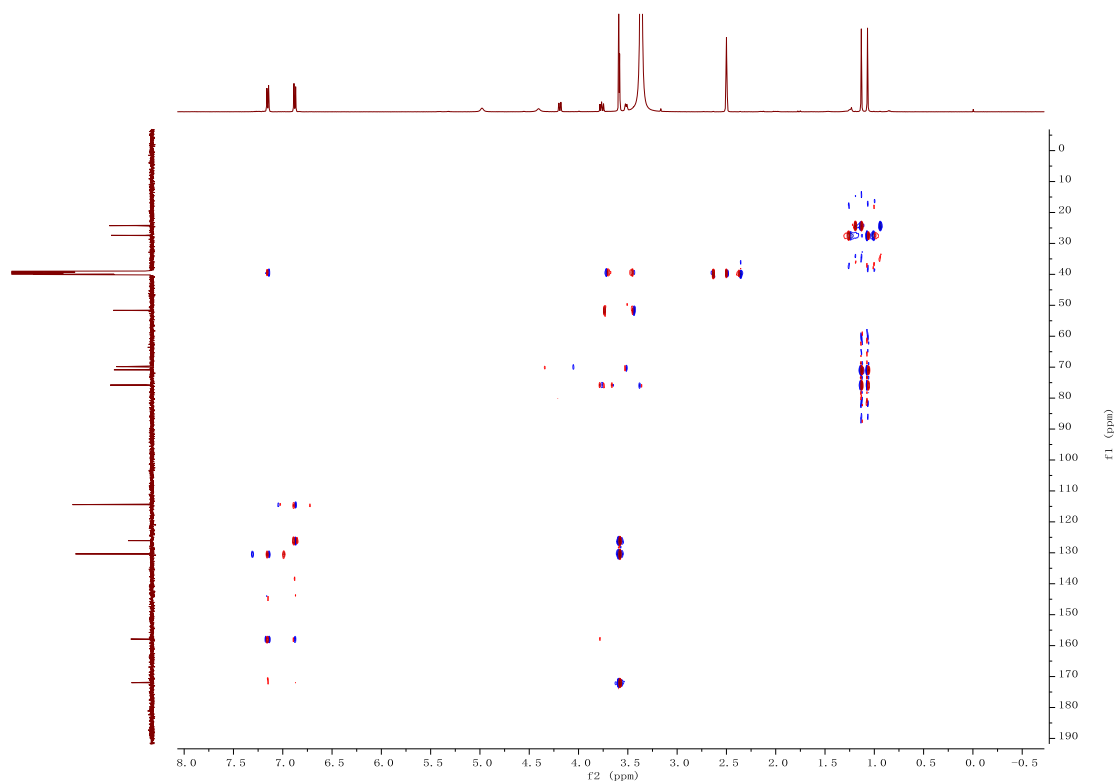

**Figure S30.** HMBC spectrum of stachyline J (**12**) in DMSO- $d_6$ .

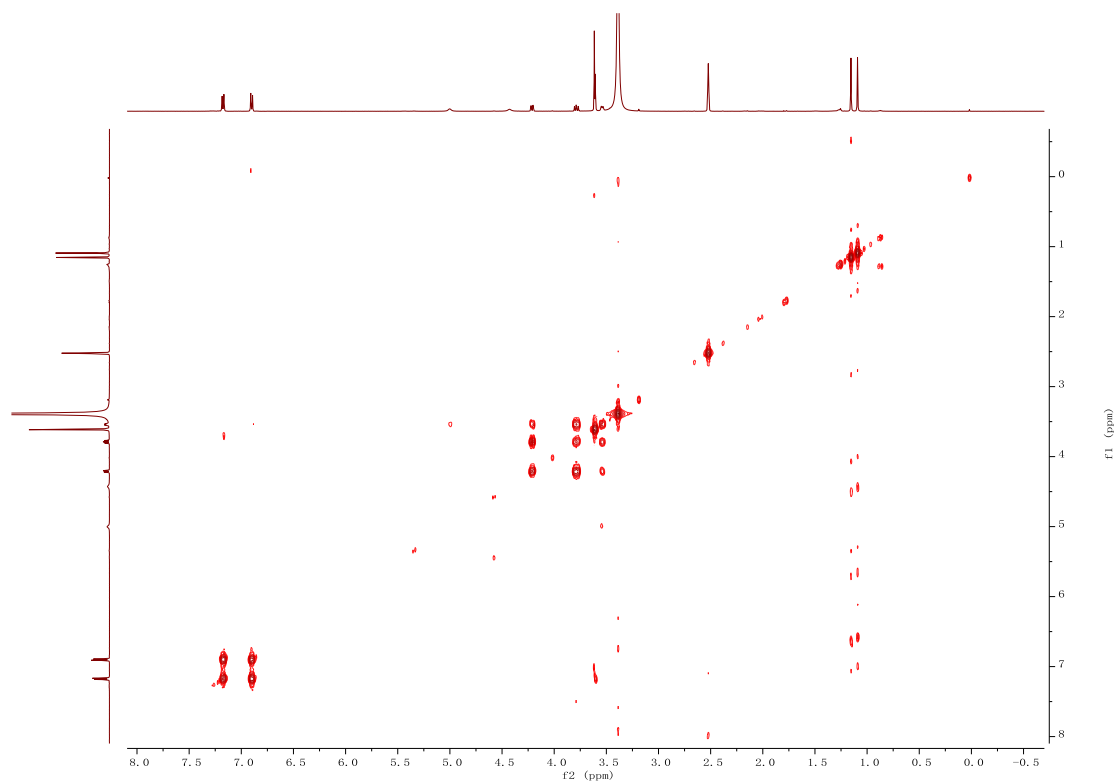

**Figure S31.**  $^1\text{H}$ - $^1\text{H}$  COSY spectrum of stachyline J (**12**) in DMSO- $d_6$ .

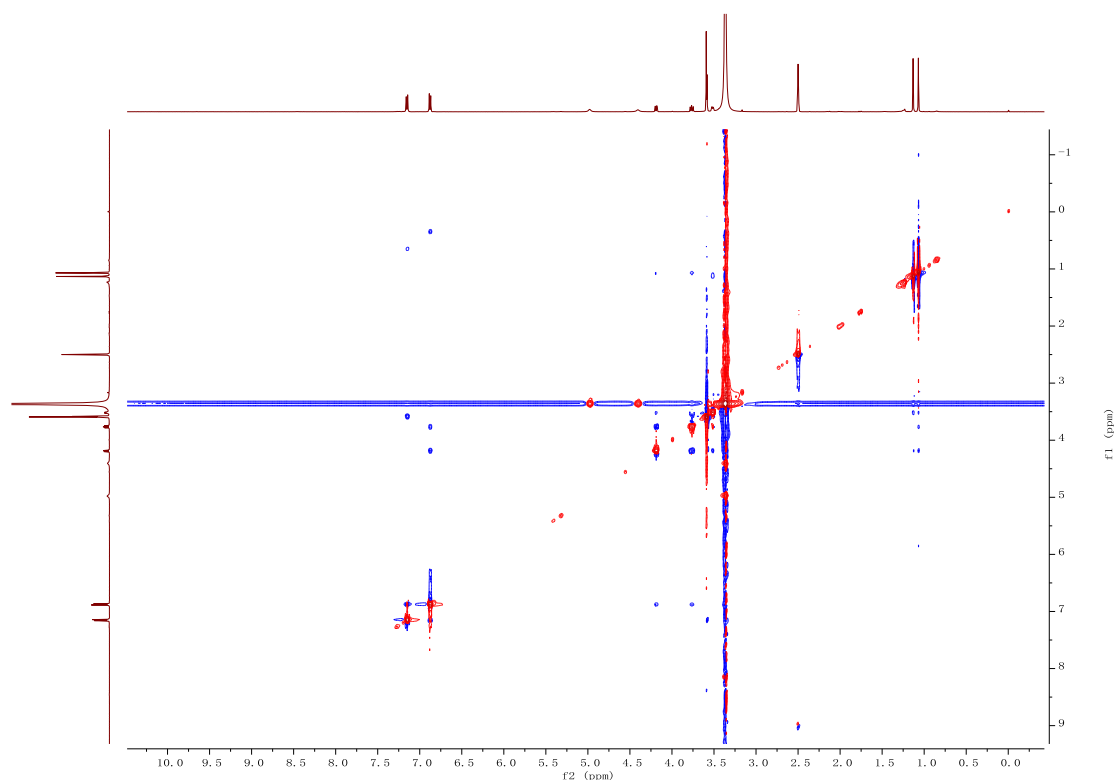

**Figure S32.** NOESY spectrum of stachyline J (**12**) in DMSO-d<sub>6</sub>.

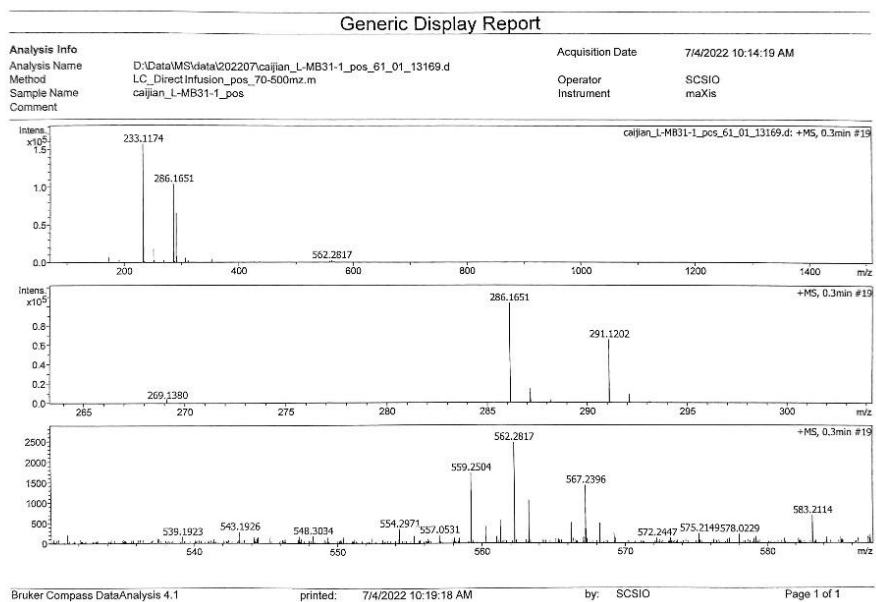

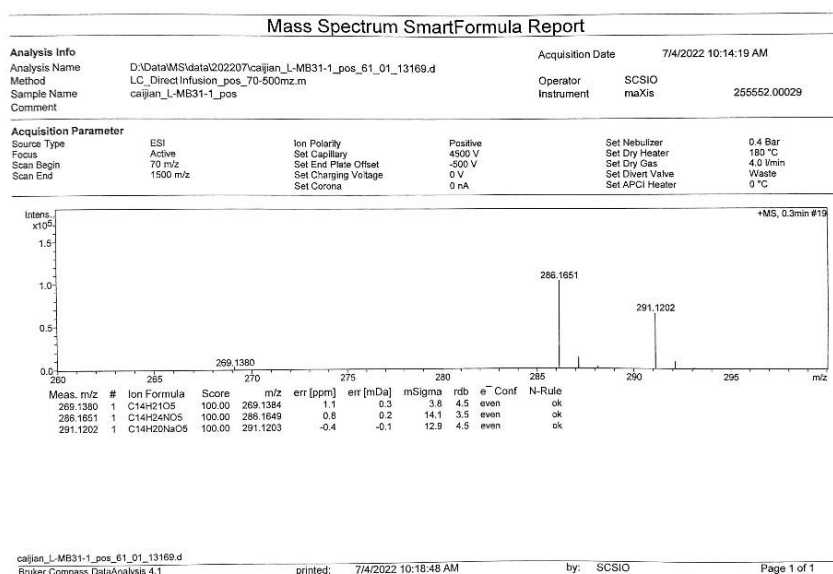

**Figure S33.** HRESIMS spectrum of stachyline J (12).

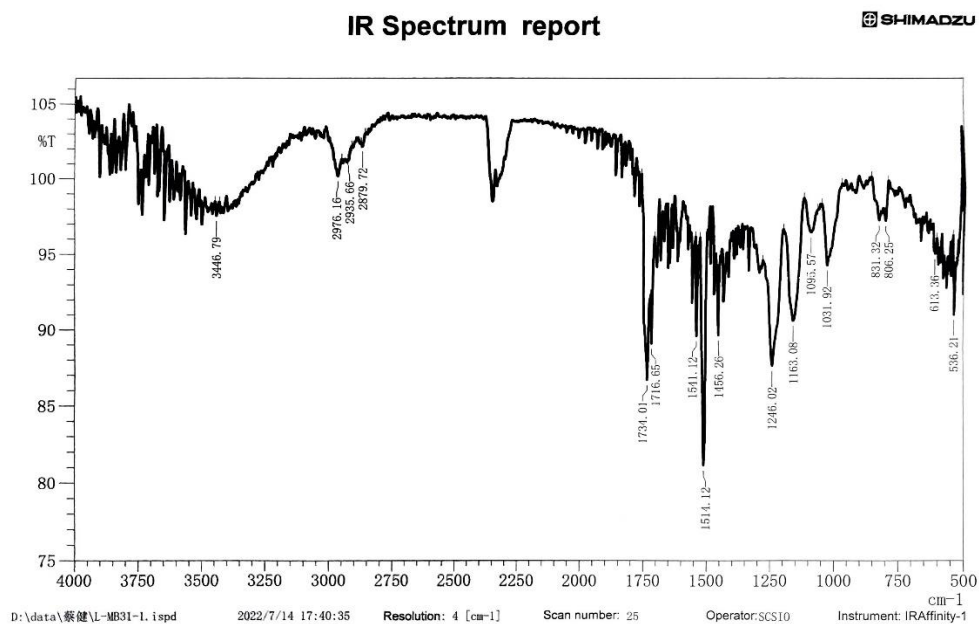

**Figure S34.** IR spectrum of stachyline J (12).

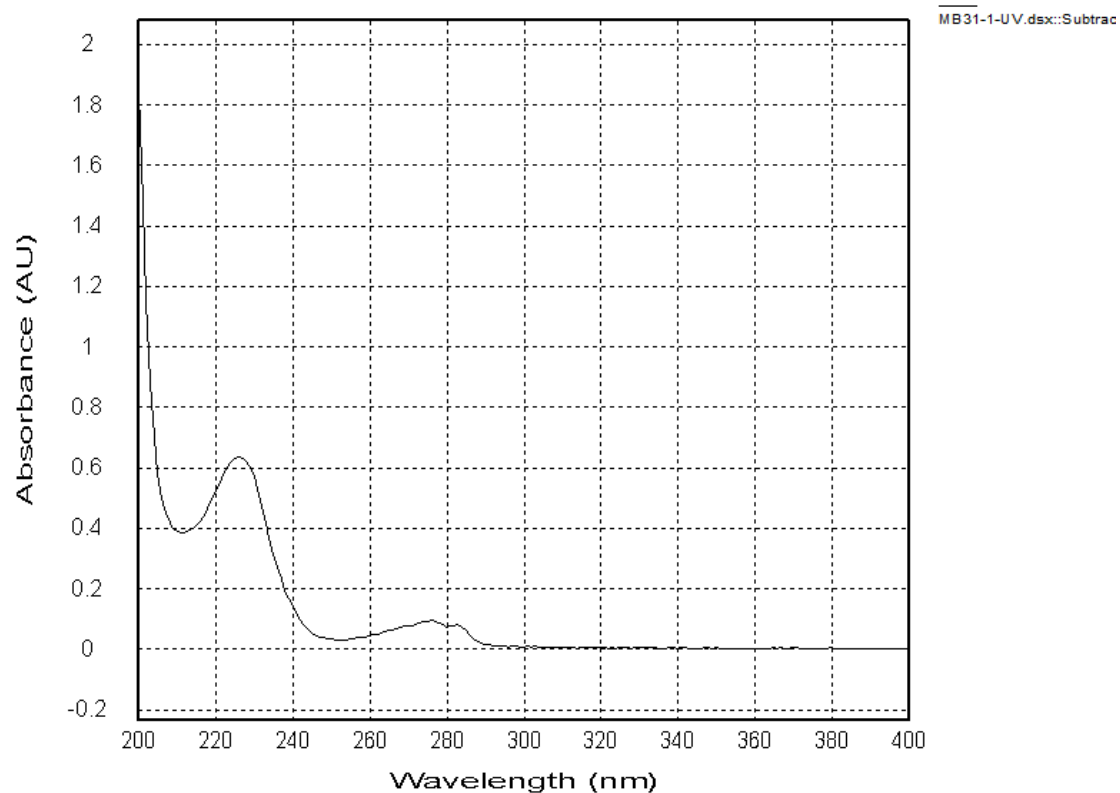

**Figure S35.** UV spectrum of stachyline J (**12**) in MeOH.

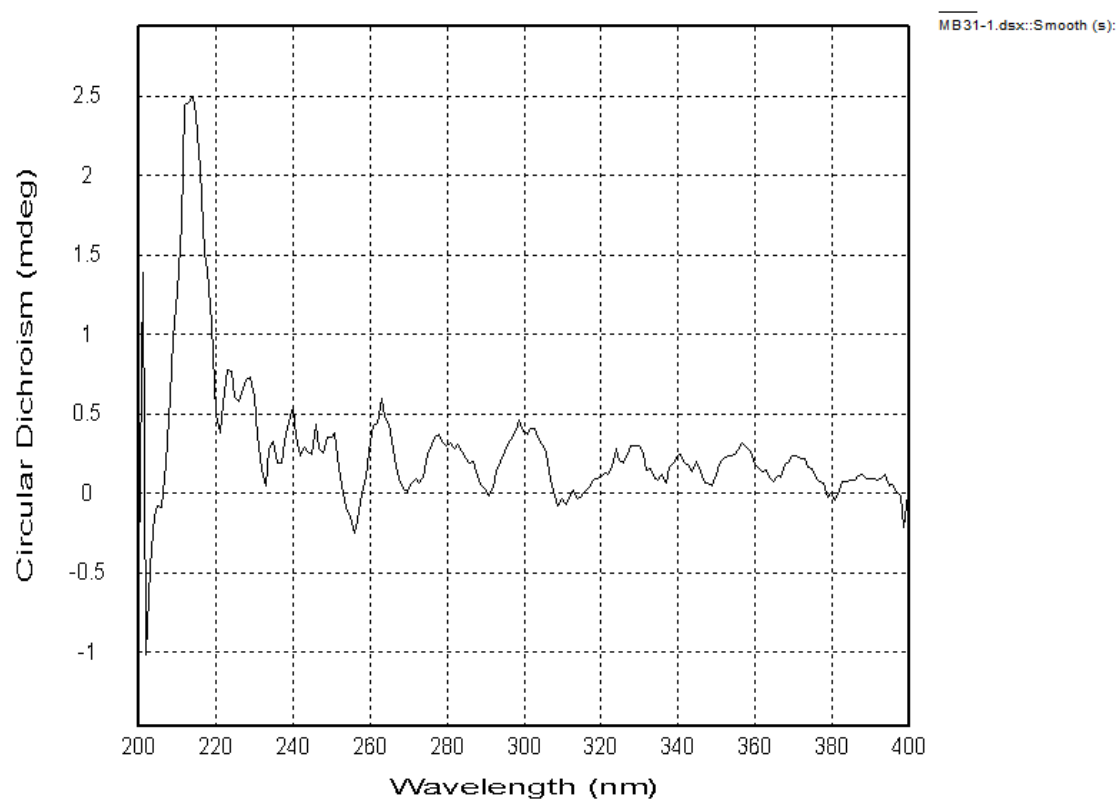

**Figure S36.** ECD spectrum of stachyline J (**12**) in MeOH.

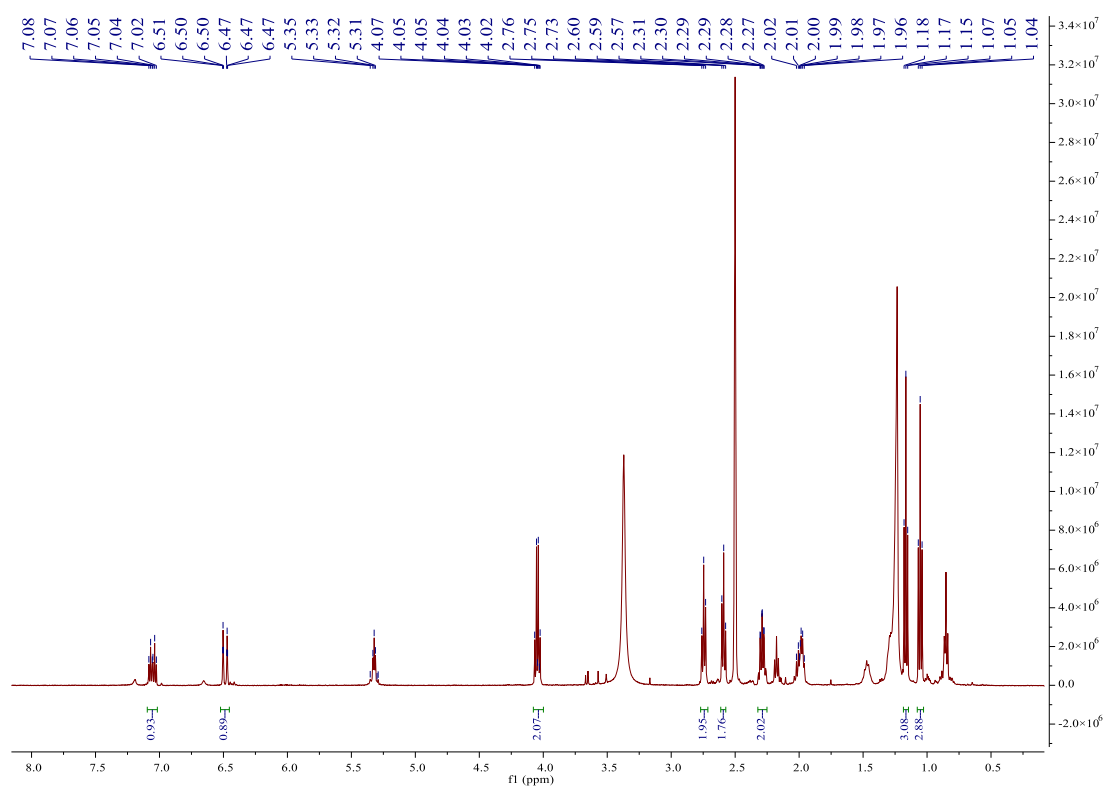

**Figure S37.**  $^1\text{H}$  NMR spectrum of maleicanhydridane (**4**) in  $\text{DMSO}-d_6$ .

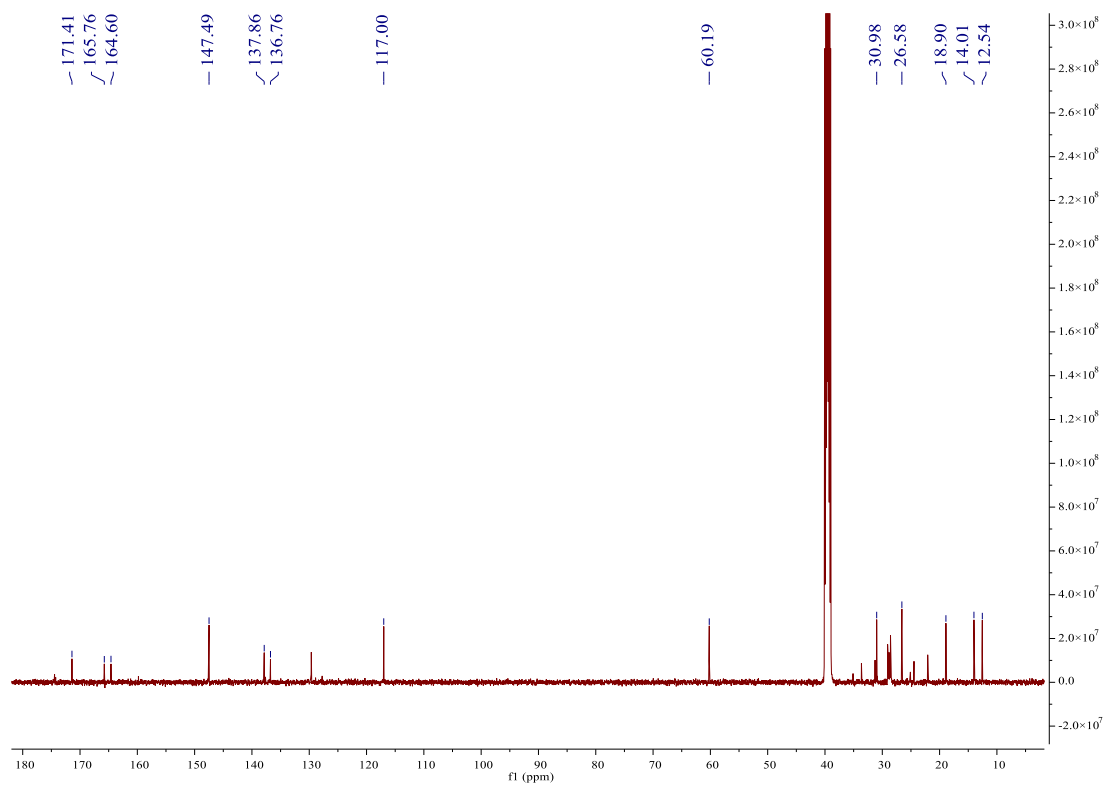

**Figure S38.**  $^{13}\text{C}$  NMR spectrum of maleicanhydridane (**4**) in  $\text{DMSO}-d_6$ .

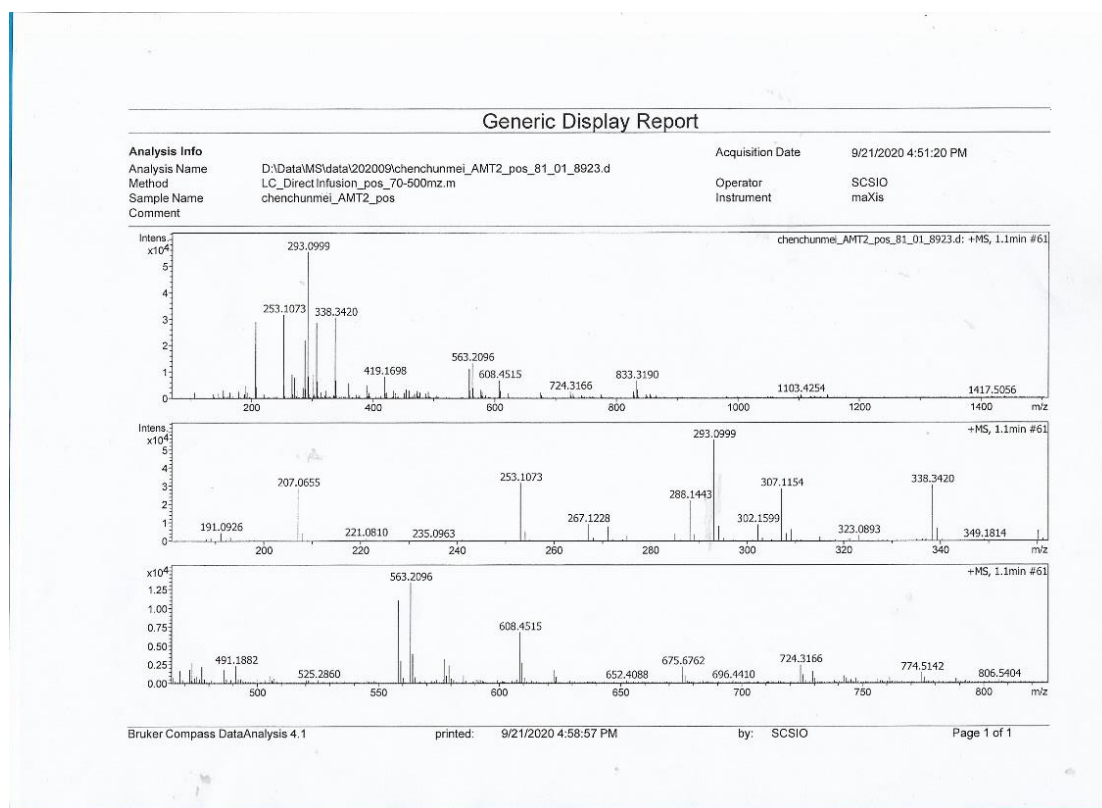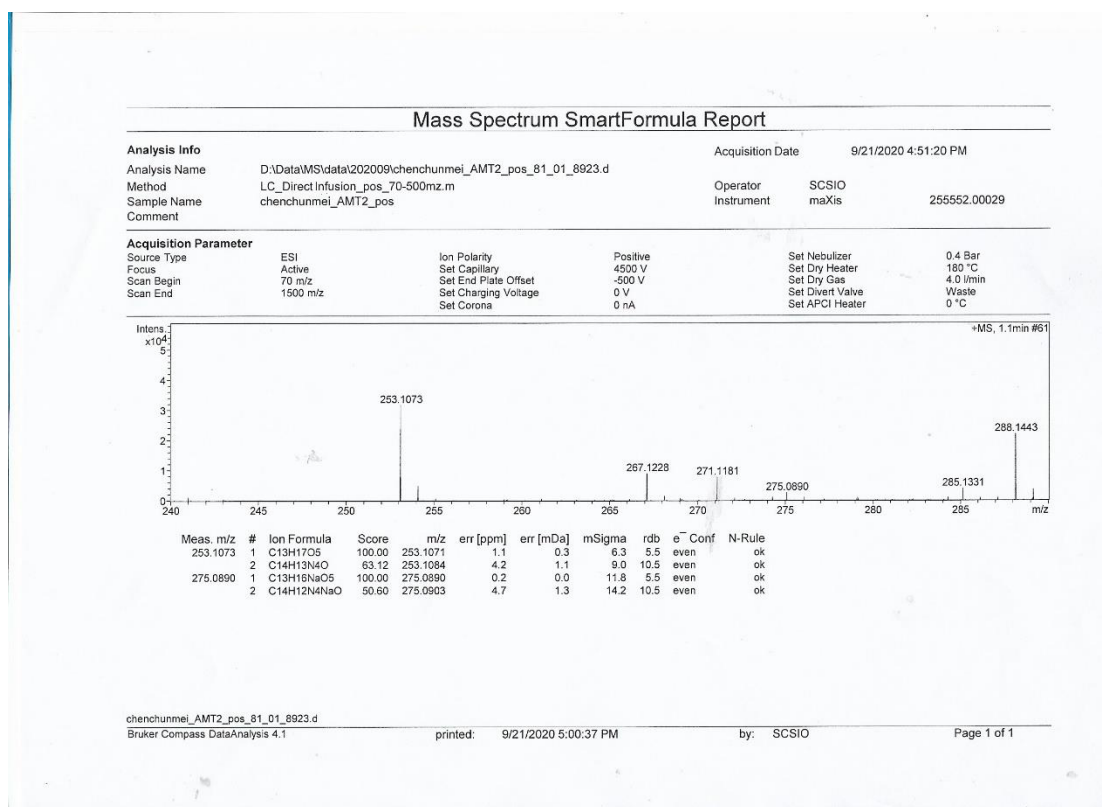

**Figure S39.** HRESIMS spectrum of maleicanhydridane (**4**).

## ECD Calculation Details for **5**.

The ECD spectra were generated based on Boltzmann distribution theory by the SpecDis 1.71 under a half band width of 0.18 eV and shifted by 0 nm to facilitate comparison to the experimental data.

**Table S1.** Energies of **5** at MMFF94 force field.

| Configuration                       | Conformer | Energy (kcal/mol) | Population (%) |
|-------------------------------------|-----------|-------------------|----------------|
| (7 <i>R</i> ,8 <i>S</i> )- <b>5</b> | 1         | 252.95            | 51.6           |
| (7 <i>R</i> ,8 <i>S</i> )- <b>5</b> | 2         | 253.12            | 48.1           |
| (7 <i>R</i> ,8 <i>S</i> )- <b>5</b> | 3         | 266.20            | 0.2            |
| (7 <i>S</i> ,8 <i>R</i> )- <b>5</b> | 1         | 252.95            | 51.6           |
| (7 <i>S</i> ,8 <i>R</i> )- <b>5</b> | 2         | 253.12            | 48.1           |
| (7 <i>S</i> ,8 <i>R</i> )- <b>5</b> | 3         | 266.20            | 0.2            |

**Table S2.** Energies of **5** at B3LYP/6–31+g(d) level in methanol.

| Configuration                       | Conformer | E (Hartree)  | E (kcal/mol)      | Population (%) |
|-------------------------------------|-----------|--------------|-------------------|----------------|
| (7 <i>R</i> ,8 <i>S</i> )- <b>5</b> | 1         | –840.8541634 | –527644.396075134 | 49.99          |
| (7 <i>R</i> ,8 <i>S</i> )- <b>5</b> | 2         | –840.8541634 | –527644.396075134 | 49.99          |
| (7 <i>R</i> ,8 <i>S</i> )- <b>5</b> | 3         | –840.8465769 | –527639.635470519 | 0.02           |
| (7 <i>S</i> ,8 <i>R</i> )- <b>5</b> | 1         | –840.8541634 | –527644.396075134 | 49.99          |
| (7 <i>S</i> ,8 <i>R</i> )- <b>5</b> | 2         | –840.8541634 | –527644.396075134 | 49.99          |
| (7 <i>S</i> ,8 <i>R</i> )- <b>5</b> | 3         | –840.8465769 | –527639.635470519 | 0.02           |

(7*R*,8*S*)-**5**

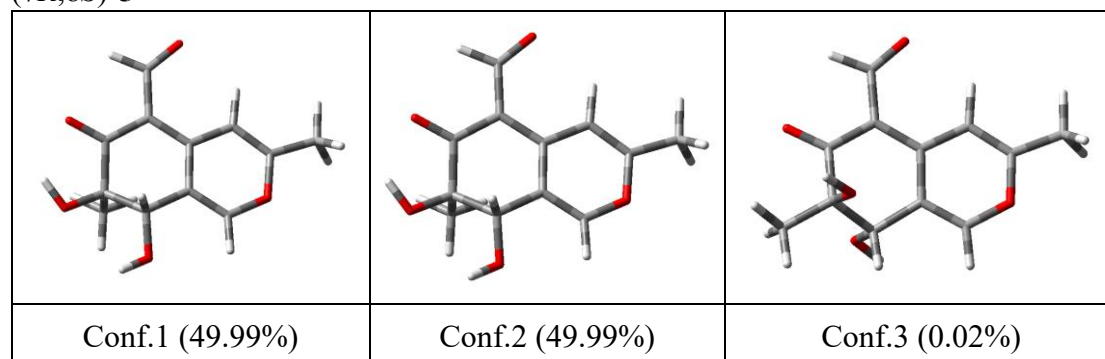

(7*S*,8*R*)-**5**

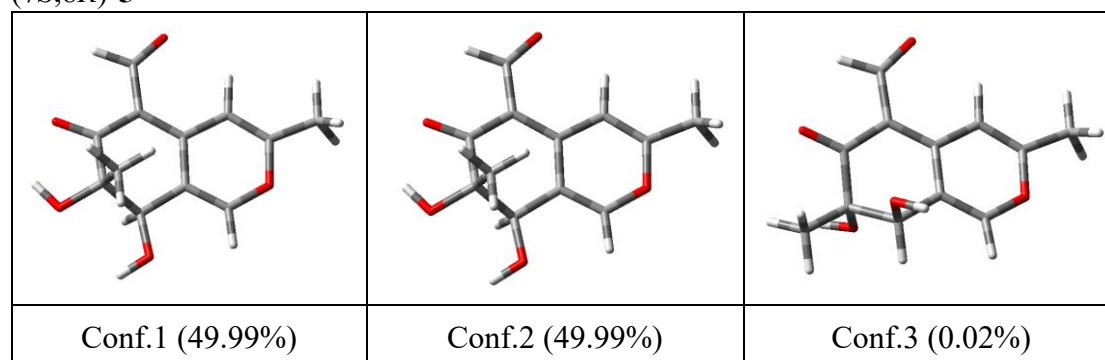

**Figure S9.** The optimized conformers and equilibrium populations of **5**.

**The strain's (*Talaromyces* sp. SCSIO 41050) ITS sequence of the rDNA**

TACTTCCGTAAGGGGGACCTGCGGAAGGATCATTACCGAGTGAGGGCCCTC  
 GCGGCCCAACCTCCCACCCTTGTCTCATATACCTGTTGCTTCGGCGGGCCC  
 ACCGGGGCCACCTGGTCGCCGGGGGACGTCTGTCCCCGGGCCCCGCGCCCCG  
 CCGGAGCGCCCTTTGAACCCTGATGAAGATGGGCTGTCTGAGTGATATGAA  
 AATTGTCAAACTTTCAACAACGAATCTCTTGGTTCCGGCATCGATGAAGA  
 ACGCAGCGAAATGCGATAAGTAATGTGAATTGCAGAATTCCGTGAATCATC  
 GAATCTTTGAACGCACATTGCGCCCCCTGGCATTCCGGGGGGCATGCCTGT  
 CCGAGCGTCATTTCTGCCCTCAAGCACGGCTTGTGTGTTGGGTGTGGTCCC  
 TCCGGGGACCTGCCCCGAAAGGCAGCGGCGACGTCCGTCTGGTCCTCGAGC  
 GTATGGGGCTCTGTCACTCGCTCGGGAAGGACCTGCGGAGGTTGGTCACC  
 ACCACATCTTTTTTACAAGGTTGACCTCGGATCAGGTAGGAGTTACCCGCT  
 GAACTTAAGCATATCTAGACGCCGAGGAA

**The strain's (*Penicillium* sp. SCSIO 41411) ITS sequence of the rDNA**

TGATATGCTTAAGTTCAGCGGGTATCCCTACCTGATCCGAGGTCAACCTGAG  
 AAAGATTGAGGGGGGTCGCCGGCGGGCGCCGGCCGGGCCTACAGAGCGG  
 GTGACGAAGCCCCATACGCTCGAGGACCGGACGCGGTGCCGCCGCTGCCT  
 TTCGGGGCCCGCCCCCGGTAGCCGGGGGGCGGGGGCCCAACACACAAGCCG  
 TGCTTGAGGGCAGCAATGACGCTCGGACAGGCATGCCCCCGGAATACCA



GGGGGCGCAATGTGCGTTCAAAGACTCGATGATTCACTGAATTCTGCAATT  
CACATTACTTATCGCATTTTCGCTGCGTTCTTCATCGATGCCGGAACCAAGAG  
ATCCGTTGTTGAAAGTTTTAACTGATTTAGCTAATCGCTCAGACTGCATTCT  
TCAGACAGCGTTCAATGGTGTCTTCGGCGGGCGCGGGCCCCGGGGGCGGAT  
GCCCCCGGCGGCCGGAACGGCGGGCCCGCCGAAGCAACAAGGTACGATA  
AACACGGGTGGGAGGTTGGACCCAGAGGGCCCTCACTCGGAATGATCCTT  
CCGCA
